# Supplementary material for: A 104-Ma record of deep-sea Atelostomata (Holasterioda, Spatangoida, irregular echinoids) – a story of persistence, food availability and a big bang
Source: PubMed Central journal article supplement (PMC10411753; doi:10.1371/journal.pone.0288046), 2023-08-09
Supplement: pone.0288046.s001.pdf [file pone.0288046.s001.pdf]

**Spine diameter across the K-Pg Boundary Event (all values in  $\mu\text{m}$ )**

| No. | Lower Paleocene | Upper Maastrichtian |                                     |               |
|-----|-----------------|---------------------|-------------------------------------|---------------|
|     | U1407C-19H-CC   | U1407C-20H-CC       | U1407C-19H-CC                       | U1407C-20H-CC |
| 1   | 81.66           | 75.35               |                                     |               |
| 2   | 96.54           | 115.05              | <b>Min</b>                          | 22.32 21.96   |
| 3   | 49.91           | 137.64              | <b>Max</b>                          | 137.38 339.00 |
| 4   | 81.32           | 102.63              | <b>Mean</b>                         | 66.26 89.87   |
| 5   | 91.01           | 21.96               | <b>Median</b>                       | 65.91 79.97   |
| 6   | 44.50           | 62.81               | <b>25 percentil</b>                 | 51.61 61.38   |
| 7   | 95.32           | 106.61              | <b>75 percentil</b>                 | 78.97 103.64  |
| 8   | 61.38           | 98.37               | <b>CV</b>                           | 31.62 50.57   |
| 9   | 72.06           | 83.98               |                                     |               |
| 10  | 96.62           | 61.38               | <b>CV: coefficient of variation</b> |               |
| 11  | 75.75           | 82.79               |                                     |               |
| 12  | 83.39           | 91.17               |                                     |               |
| 13  | 88.53           | 42.69               |                                     |               |
| 14  | 106.40          | 104.59              |                                     |               |
| 15  | 42.48           | 51.23               |                                     |               |
| 16  | 29.32           | 58.65               |                                     |               |
| 17  | 66.22           | 69.71               |                                     |               |
| 18  | 36.17           | 54.74               |                                     |               |
| 19  | 76.65           | 54.84               |                                     |               |
| 20  | 64.97           | 80.45               |                                     |               |
| 21  | 64.36           | 109.48              |                                     |               |
| 22  | 72.21           | 37.50               |                                     |               |
| 23  | 38.15           | 50.62               |                                     |               |
| 24  | 62.98           | 93.98               |                                     |               |
| 25  | 88.53           | 162.96              |                                     |               |
| 26  | 53.48           | 108.77              |                                     |               |
| 27  | 54.84           | 51.23               |                                     |               |
| 28  | 54.74           | 59.82               |                                     |               |
| 29  | 99.96           | 64.04               |                                     |               |
| 30  | 70.08           | 131.04              |                                     |               |
| 31  | 45.97           | 47.73               |                                     |               |
| 32  | 65.91           | 124.14              |                                     |               |
| 33  | 58.36           | 76.82               |                                     |               |
| 34  | 53.26           | 90.87               |                                     |               |
| 35  | 101.06          | 115.01              |                                     |               |
| 36  | 75.70           | 59.44               |                                     |               |
| 37  | 75.15           | 68.21               |                                     |               |
| 38  | 43.62           | 92.15               |                                     |               |
| 39  | 77.93           | 95.70               |                                     |               |
| 40  | 100.28          | 62.41               |                                     |               |
| 41  | 53.68           | 134.49              |                                     |               |
| 42  | 51.40           | 49.72               |                                     |               |
| 43  | 56.99           | 84.32               |                                     |               |
| 44  | 51.38           | 66.91               |                                     |               |
| 45  | 57.25           | 97.35               |                                     |               |
| 46  | 62.81           | 98.68               |                                     |               |

|    |        |        |
|----|--------|--------|
| 47 | 55.56  | 54.32  |
| 48 | 42.61  | 62.68  |
| 49 | 76.09  | 85.93  |
| 50 | 55.75  | 73.24  |
| 51 | 70.99  | 74.50  |
| 52 | 71.66  | 55.18  |
| 53 | 65.37  | 32.07  |
| 54 | 76.84  | 73.25  |
| 55 | 82.91  | 93.56  |
| 56 | 24.44  | 209.77 |
| 57 | 57.27  | 130.60 |
| 58 | 42.61  | 84.27  |
| 59 | 53.06  | 97.75  |
| 60 | 51.81  | 110.17 |
| 61 | 44.26  | 116.02 |
| 62 | 46.78  | 71.46  |
| 63 | 78.88  | 100.09 |
| 64 | 36.73  | 72.99  |
| 65 | 49.72  | 118.54 |
| 66 | 47.23  | 117.57 |
| 67 | 37.69  | 123.88 |
| 68 | 22.68  | 51.40  |
| 69 | 31.65  | 65.57  |
| 70 | 39.95  | 109.24 |
| 71 | 69.20  | 116.12 |
| 72 | 70.92  | 99.87  |
| 73 | 44.08  | 100.86 |
| 74 | 85.40  | 87.57  |
| 75 | 55.00  | 99.26  |
| 76 | 72.74  | 39.72  |
| 77 | 48.47  | 56.07  |
| 78 | 102.08 | 173.90 |
| 79 | 79.05  | 90.12  |
| 80 | 50.67  | 73.72  |
| 81 | 68.23  | 70.77  |
| 82 | 52.32  | 58.36  |
| 83 | 52.22  | 54.40  |
| 84 | 47.28  | 64.04  |
| 85 | 55.13  | 58.98  |
| 86 | 70.89  | 100.47 |
| 87 | 59.55  | 69.87  |
| 88 | 54.59  | 75.91  |
| 89 | 55.94  | 104.18 |
| 90 | 41.13  | 66.34  |
| 91 | 23.56  | 174.86 |
| 92 | 57.64  | 151.59 |
| 93 | 98.87  | 60.74  |
| 94 | 49.91  | 64.54  |
| 95 | 42.63  | 146.25 |
| 96 | 60.99  | 259.41 |

|     |        |        |
|-----|--------|--------|
| 97  | 99.38  | 86.64  |
| 98  | 68.74  | 45.27  |
| 99  | 85.60  | 40.74  |
| 100 | 101.49 | 67.02  |
| 101 | 65.50  | 84.21  |
| 102 | 92.84  | 60.79  |
| 103 | 45.27  | 68.26  |
| 104 | 58.24  | 92.49  |
| 105 | 77.24  | 73.96  |
| 106 | 113.84 | 82.78  |
| 107 | 66.86  | 48.96  |
| 108 | 54.66  | 62.58  |
| 109 | 50.88  | 53.03  |
| 110 | 101.23 | 51.16  |
| 111 | 60.22  | 45.91  |
| 112 | 45.06  | 89.45  |
| 113 | 77.64  | 47.71  |
| 114 | 88.86  | 80.18  |
| 115 | 102.53 | 69.45  |
| 116 | 53.28  | 117.55 |
| 117 | 68.33  | 93.72  |
| 118 | 66.63  | 58.65  |
| 119 | 89.46  | 109.49 |
| 120 | 22.32  | 56.77  |
| 121 | 66.22  | 58.98  |
| 122 | 59.44  | 65.01  |
| 123 | 73.44  | 113.99 |
| 124 | 25.85  | 64.36  |
| 125 | 66.58  | 78.84  |
| 126 | 69.45  | 101.20 |
| 127 | 73.96  | 97.28  |
| 128 | 36.83  | 81.92  |
| 129 | 43.21  | 50.97  |
| 130 | 73.53  | 53.26  |
| 131 | 77.23  | 103.18 |
| 132 | 70.79  | 195.09 |
| 133 | 67.37  | 209.19 |
| 134 | 109.80 | 103.86 |
| 135 | 72.76  | 106.13 |
| 136 | 80.44  | 209.14 |
| 137 | 37.14  | 95.66  |
| 138 | 42.16  | 49.54  |
| 139 | 77.93  | 76.50  |
| 140 | 56.52  | 117.18 |
| 141 | 68.03  | 97.78  |
| 142 | 93.66  | 59.62  |
| 143 | 82.35  | 178.53 |
| 144 | 47.64  | 56.62  |
| 145 | 59.98  | 55.24  |
| 146 | 55.18  | 81.22  |

|     |        |        |
|-----|--------|--------|
| 147 | 73.27  | 74.11  |
| 148 | 101.20 | 61.83  |
| 149 | 67.17  | 73.66  |
| 150 | 87.88  | 77.57  |
| 151 | 59.55  | 339.00 |
| 152 | 42.63  | 66.53  |
| 153 | 105.76 | 72.85  |
| 154 | 52.20  | 63.04  |
| 155 | 137.38 | 83.53  |
| 156 | 86.64  | 68.47  |
| 157 | 39.95  | 79.43  |
| 158 | 94.69  | 108.98 |
| 159 | 93.13  | 92.41  |
| 160 | 102.66 | 79.97  |
| 161 | 62.22  | 59.36  |
| 162 | 66.75  | 92.19  |
| 163 | 78.45  | 58.78  |
| 164 | 93.13  | 103.64 |
| 165 | 64.35  | 67.18  |
| 166 | 68.08  | 332.44 |
| 167 | 54.23  | 162.70 |
| 168 | 82.28  | 130.43 |
| 169 | 79.09  | 70.21  |
| 170 |        | 87.27  |
| 171 |        | 123.69 |
