# Supplementary material for: A 104-Ma record of deep-sea Atelostomata (Holasterioda, Spatangoida, irregular echinoids) – a story of persistence, food availability and a big bang
Source: PubMed Central journal article supplement (PMC10411753; doi:10.1371/journal.pone.0288046), 2023-08-09
Supplement: pone.0288046.s002.pdf [file pone.0288046.s002.pdf]

**data set Hole 738B**

| <b>sample id</b> | <b>hole</b> | <b>age in Fig. 7</b> | <b>spines</b> | <b>spines/g</b> | <b>dry weight (g)</b> | <b>LSR</b> | <b>DBD</b> | <b>ASAR</b> |
|------------------|-------------|----------------------|---------------|-----------------|-----------------------|------------|------------|-------------|
| 1                | 738B        | 39.00                | 40            | 2.34            | 17.13                 | 1.18       | 1.19       | 3.28        |
| 2                | 738B        | 39.00                | 13            | 1.12            | 11.64                 | 1.18       | 1.19       | 1.57        |
| 3                | 738B        | 39.00                | 22            | 1.54            | 14.32                 | 1.18       | 1.19       | 2.16        |
| 4                | 738B        | 39.00                | 18            | 1.02            | 17.64                 | 1.18       | 1.19       | 1.43        |
| 5                | 738B        | 39.00                | 20            | 1.47            | 13.56                 | 1.18       | 1.19       | 2.07        |
| 6                | 738B        | 39.00                | 17            | 1.68            | 10.14                 | 1.18       | 1.19       | 2.35        |
| 7                | 738B        | 39.00                | 40            | 2.22            | 18.02                 | 1.18       | 1.19       | 3.12        |
| 8                | 738B        | 39.00                | 35            | 2.78            | 12.61                 | 1.18       | 1.19       | 3.90        |
| 9                | 738B        | 39.00                | 32            | 2.13            | 15.01                 | 1.18       | 1.19       | 2.99        |
| 10               | 738B        | 39.00                | 63            | 7.02            | 8.97                  | 1.18       | 1.19       | 9.86        |
| 11               | 738B        | 39.00                | 42            | 2.96            | 14.2                  | 1.18       | 1.19       | 4.15        |
| 12               | 738B        | 39.00                | 37            | 3.56            | 10.4                  | 1.18       | 1.19       | 5.00        |
| 13               | 738B        | 39.00                | 130           | 8.25            | 15.76                 | 1.18       | 1.19       | 11.58       |
| 14               | 738B        | 39.00                | 112           | 7.04            | 15.9                  | 1.18       | 1.19       | 9.89        |
| 15               | 738B        | 39.00                | 176           | 8.40            | 20.95                 | 1.18       | 1.19       | 11.80       |
| 16               | 738B        | 39.00                | 130           | 7.72            | 16.84                 | 1.18       | 1.19       | 10.84       |
| 17               | 738B        | 39.00                | 43            | 2.52            | 17.03                 | 1.18       | 1.19       | 3.55        |
| 18               | 738B        | 39.00                | 98            | 5.88            | 16.66                 | 1.18       | 1.19       | 8.26        |
| 19               | 738B        | 39.00                | 34            | 2.19            | 15.51                 | 1.18       | 1.19       | 3.08        |
| 20               | 738B        | 39.00                | 9             | 0.69            | 13.02                 | 1.18       | 1.19       | 0.97        |
| 21               | 738B        | 39.00                | 32            | 1.88            | 17.04                 | 1.18       | 1.11       | 2.46        |

LSR: linear sedimentation rate

DBD: dry bulk density

ASAR: atelostomate spine accumulation rate
