# Supplementary material for: A 104-Ma record of deep-sea Atelostomata (Holasterioda, Spatangoida, irregular echinoids) – a story of persistence, food availability and a big bang
Source: PubMed Central journal article supplement (PMC10411753; doi:10.1371/journal.pone.0288046), 2023-08-09
Supplement: pone.0288046.s003.pdf [file pone.0288046.s003.pdf]

data set Hole 849D

| sample id | hole | core  | age in Fig. 7 | spines | spines/g | dry weight (g) | LSR  | DBD  | ASAR |
|-----------|------|-------|---------------|--------|----------|----------------|------|------|------|
| 1         | 849D | 8H-2W | 3.02myr       | 16     | 1.34     | 11.92          | 2.95 | 0.82 | 3.25 |
| 2         | 849D | 8H-2W | 3.02myr       | 11     | 1.00     | 11.05          | 2.95 | 0.71 | 2.08 |
| 3         | 849D | 8H-2W | 3.02myr       | 17     | 1.36     | 12.54          | 2.95 | 0.71 | 2.82 |
| 4         | 849D | 8H-2W | 3.02myr       | 25     | 1.96     | 12.77          | 2.95 | 0.67 | 3.89 |
| 5         | 849D | 8H-2W | 3.02myr       | 13     | 0.99     | 13.07          | 2.95 | 0.74 | 2.17 |
| 6         | 849D | 8H-2W | 3.02myr       | 10     | 0.82     | 12.18          | 2.88 | 0.72 | 1.71 |
| 7         | 849D | 8H-2W | 3.02myr       | 17     | 2.48     | 6.85           | 2.88 | 0.75 | 5.35 |
| 8         | 849D | 8H-2W | 3.02myr       | 22     | 1.72     | 12.81          | 2.88 | 0.73 | 3.61 |
| 9         | 849D | 8H-2W | 3.02myr       | 24     | 2.03     | 11.84          | 2.88 | 0.68 | 3.97 |
| 10        | 849D | 8H-2W | 3.02myr       | 23     | 1.97     | 11.7           | 2.88 | 0.68 | 3.85 |
| 11        | 849D | 8H-2W | 3.02myr       | 10     | 0.79     | 12.64          | 2.88 | 0.66 | 1.52 |
| 12        | 849D | 8H-2W | 3.02myr       | 6      | 0.58     | 10.26          | 2.88 | 0.67 | 1.13 |
| 13        | 849D | 8H-2W | 3.02myr       | 11     | 0.93     | 11.8           | 2.88 | 0.58 | 1.57 |
| 14        | 849D | 8H-2W | 3.02myr       | 5      | 0.58     | 8.59           | 2.88 | 0.50 | 0.84 |
| 15        | 849D | 8H-2W | 3.02myr       | 6      | 0.76     | 7.85           | 2.88 | 0.51 | 1.11 |
| 16        | 849D | 8H-2W | 3.02myr       | 14     | 1.44     | 9.74           | 2.88 | 0.61 | 2.53 |
| 17        | 849D | 8H-2W | 3.02myr       | 10     | 1.05     | 9.55           | 2.88 | 0.55 | 1.66 |
| 18        | 849D | 8H-2W | 3.02myr       | 8      | 0.87     | 9.17           | 2.88 | 0.51 | 1.29 |
| 19        | 849D | 8H-2W | 3.02myr       | 12     | 1.28     | 9.35           | 2.88 | 0.50 | 1.86 |
| 20        | 849D | 8H-2W | 3.02myr       | 9      | 1.25     | 7.21           | 2.88 | 0.48 | 1.73 |
| 21        | 849D | 8H-2W | 3.02myr       | 16     | 1.93     | 8.27           | 2.88 | 0.40 | 2.23 |
| 22        | 849D | 8H-2W | 3.02myr       | 7      | 0.88     | 7.94           | 2.88 | 0.48 | 1.23 |
| 23        | 849D | 8H-2W | 3.02myr       | 9      | 1.04     | 8.64           | 2.88 | 0.49 | 1.47 |
| 24        | 849D | 8H-2W | 3.02myr       | 5      | 0.46     | 10.93          | 2.88 | 0.46 | 0.60 |
| 25        | 849D | 8H-2W | 3.02myr       | 16     | 1.52     | 10.55          | 2.88 | 0.54 | 2.36 |
| 26        | 849D | 8H-2W | 3.02myr       | 13     | 1.38     | 9.41           | 2.88 | 0.57 | 2.26 |
| 27        | 849D | 8H-2W | 3.02myr       | 14     | 1.65     | 8.51           | 2.88 | 0.57 | 2.72 |
| 28        | 849D | 8H-2W | 3.02myr       | 18     | 1.84     | 9.77           | 2.88 | 0.58 | 3.07 |
| 29        | 849D | 8H-2W | 3.02myr       | 17     | 1.82     | 9.33           | 2.88 | 0.57 | 2.98 |
| 30        | 849D | 8H-2W | 3.02myr       | 12     | 1.37     | 8.73           | 2.88 | 0.53 | 2.10 |
| 31        | 849D | 8H-2W | 3.02myr       | 14     | 1.59     | 8.78           | 2.88 | 0.65 | 3.01 |
| 32        | 849D | 8H-2W | 3.02myr       | 33     | 2.99     | 11.02          | 2.88 | 0.75 | 6.44 |
| 33        | 849D | 8H-2W | 3.02myr       | 25     | 2.02     | 12.37          | 2.88 | 0.71 | 4.14 |
| 34        | 849D | 8H-2W | 3.02myr       | 20     | 1.62     | 12.38          | 2.52 | 0.66 | 2.70 |
| 35        | 849D | 8H-2W | 3.02myr       | 14     | 1.24     | 11.3           | 2.52 | 0.64 | 2.01 |
| 36        | 849D | 8H-2W | 3.02myr       | 18     | 1.47     | 12.25          | 2.52 | 0.63 | 2.35 |
| 37        | 849D | 8H-2W | 3.02myr       | 10     | 0.78     | 12.74          | 2.52 | 0.71 | 1.40 |

LSR: linear sedimentation rate

DBD: dry bulk density

ASAR: atelostomate spine accumulation rate
