# Supplementary material for: A 104-Ma record of deep-sea Atelostomata (Holasterioda, Spatangoida, irregular echinoids) – a story of persistence, food availability and a big bang
Source: PubMed Central journal article supplement (PMC10411753; doi:10.1371/journal.pone.0288046), 2023-08-09
Supplement: pone.0288046.s004.pdf [file pone.0288046.s004.pdf]

**data set Hole 1050C**

| <b>sample id</b> | <b>hole</b> | <b>core</b> | <b>age in Fig. 7</b> | <b>spines</b> | <b>spines/g</b> | <b>dry weight (g)</b> | <b>LSR</b> | <b>DBD</b> | <b>ASAR</b> |
|------------------|-------------|-------------|----------------------|---------------|-----------------|-----------------------|------------|------------|-------------|
| 1                | 1050C       | 21R-1W      | 93.00                | 46            | 0.93            | 49.5                  | 0.14       | 1.8        | 0.23        |
| 2                | 1050C       | 21R-1W      | 93.00                | 82            | 1.80            | 45.5                  | 0.14       | 1.8        | 0.45        |
| 3                | 1050C       | 21R-1W      | 93.00                | 9             | 0.21            | 43.2                  | 0.14       | 1.8        | 0.05        |
| 4                | 1050C       | 21R-1W      | 93.00                | 27            | 0.56            | 48.6                  | 0.14       | 1.8        | 0.14        |

LSR: linear sedimentation rate

DBD: dry bulk density

ASAR: atelostomate spine accumulation rate
