# Supplementary material for: A 104-Ma record of deep-sea Atelostomata (Holasterioda, Spatangoida, irregular echinoids) – a story of persistence, food availability and a big bang
Source: PubMed Central journal article supplement (PMC10411753; doi:10.1371/journal.pone.0288046), 2023-08-09
Supplement: pone.0288046.s005.pdf [file pone.0288046.s005.pdf]

| sample id | hole   | age in Fig. 7 | spines | spines/g | dry weight (g) | LSR  | DBD  | ASAR |
|-----------|--------|---------------|--------|----------|----------------|------|------|------|
| 1         | U1334A | 25.86         | 3      | 0.22     | 13.66          | 2.20 | 0.90 | 0.43 |
| 2         | U1334A | 25.86         | 4      | 0.31     | 12.82          | 2.20 | 0.89 | 0.61 |
| 3         | U1334A | 25.86         | 10     | 0.73     | 13.68          | 2.20 | 0.92 | 1.48 |
| 4         | U1334A | 25.86         | 4      | 0.39     | 10.27          | 2.20 | 0.96 | 0.82 |
| 5         | U1334A | 25.86         | 8      | 0.60     | 13.24          | 2.20 | 0.94 | 1.25 |
| 6         | U1334A | 25.86         | 8      | 0.66     | 12.16          | 2.20 | 0.98 | 1.42 |
| 7         | U1334A | 25.86         | 8      | 0.69     | 11.65          | 2.20 | 0.95 | 1.44 |
| 8         | U1334A | 25.86         | 6      | 0.44     | 13.59          | 2.20 | 0.90 | 0.88 |
| 9         | U1334A | 25.86         | 4      | 0.28     | 14.39          | 2.20 | 0.90 | 0.55 |
| 10        | U1334A | 25.86         | 2      | 0.17     | 12.05          | 2.20 | 0.88 | 0.32 |
| 11        | U1334A | 25.86         | 21     | 1.50     | 13.96          | 2.20 | 0.93 | 3.08 |
| 12        | U1334A | 25.86         | 13     | 1.03     | 12.6           | 2.20 | 0.94 | 2.14 |
| 13        | U1334A | 25.86         | 11     | 0.95     | 11.59          | 2.20 | 0.91 | 1.89 |
| 14        | U1334A | 25.86         | 5      | 0.39     | 12.92          | 2.20 | 0.99 | 0.84 |
| 15        | U1334A | 25.86         | 11     | 0.80     | 13.69          | 2.20 | 0.95 | 1.68 |
| 16        | U1334A | 25.86         | 23     | 1.52     | 15.1           | 2.20 | 0.96 | 3.22 |
| 17        | U1334A | 25.86         | 16     | 1.39     | 11.51          | 2.20 | 0.99 | 3.02 |
| 18        | U1334A | 25.86         | 17     | 1.29     | 13.18          | 2.20 | 1.01 | 2.87 |
| 19        | U1334A | 25.86         | 35     | 2.24     | 15.61          | 0.88 | 1.02 | 2.00 |
| 20        | U1334A | 25.86         | 11     | 0.86     | 12.78          | 0.88 | 0.98 | 0.74 |
| 21        | U1334A | 25.86         | 11     | 0.90     | 12.22          | 0.88 | 1.01 | 0.80 |
| 22        | U1334A | 25.86         | 3      | 0.24     | 12.42          | 0.88 | 1.00 | 0.21 |
| 23        | U1334A | 25.86         | 4      | 0.34     | 11.66          | 0.88 | 0.96 | 0.29 |
| 24        | U1334A | 25.86         | 7      | 0.49     | 14.41          | 0.88 | 1.01 | 0.43 |
| 25        | U1334A | 25.86         | 6      | 0.46     | 13.09          | 1.20 | 1.01 | 0.56 |
| 26        | U1334A | 25.86         | 7      | 0.66     | 10.67          | 1.20 | 0.95 | 0.75 |
| 27        | U1334A | 25.86         | 7      | 0.54     | 12.9           | 1.20 | 0.96 | 0.63 |
| 28        | U1334A | 25.86         | 5      | 0.37     | 13.49          | 1.20 | 0.94 | 0.42 |
| 29        | U1334A | 25.86         | 7      | 0.56     | 12.41          | 1.20 | 0.90 | 0.61 |
| 30        | U1334A | 25.86         | 9      | 0.77     | 11.7           | 1.20 | 0.96 | 0.89 |
| 31        | U1334A | 25.86         | 35     | 2.83     | 12.35          | 1.20 | 0.96 | 3.28 |
| 32        | U1334A | 25.86         | 28     | 2.16     | 12.96          | 1.20 | 0.96 | 2.49 |
| 33        | U1334A | 25.86         | 25     | 2.00     | 12.47          | 1.20 | 0.95 | 2.30 |
| 34        | U1334B | 25.86         | 11     | 1.50     | 7.35           | 1.20 | 0.94 | 1.69 |
| 35        | U1334B | 25.86         | 11     | 1.42     | 7.76           | 1.20 | 0.97 | 1.65 |
| 36        | U1334B | 25.86         | 14     | 1.59     | 8.82           | 1.20 | 0.95 | 1.81 |
| 37        | U1334B | 25.86         | 13     | 1.46     | 8.92           | 1.20 | 0.96 | 1.69 |
| 38        | U1334B | 25.86         | 5      | 0.59     | 8.51           | 1.02 | 0.94 | 0.56 |
| 39        | U1334B | 25.86         | 9      | 1.18     | 7.62           | 1.02 | 0.89 | 1.07 |
| 40        | U1334B | 25.86         | 9      | 1.16     | 7.78           | 1.02 | 0.84 | 0.99 |
| 41        | U1334B | 25.86         | 13     | 1.64     | 7.95           | 1.02 | 0.88 | 1.46 |
| 42        | U1334B | 25.86         | 4      | 0.54     | 7.36           | 1.02 | 0.86 | 0.47 |
| 43        | U1334B | 25.86         | 2      | 0.28     | 7.04           | 1.02 | 0.85 | 0.24 |
| 44        | U1334B | 25.86         | 3      | 0.35     | 8.63           | 1.02 | 0.88 | 0.31 |
| 45        | U1334B | 25.86         | 4      | 0.55     | 7.29           | 1.02 | 0.84 | 0.47 |

|    |        |       |    |      |       |      |      |      |
|----|--------|-------|----|------|-------|------|------|------|
| 46 | U1334B | 25.86 | 11 | 1.36 | 8.07  | 1.02 | 0.84 | 1.16 |
| 47 | U1334B | 25.86 | 15 | 1.95 | 7.7   | 1.02 | 0.85 | 1.69 |
| 48 | U1334B | 25.86 | 8  | 1.12 | 7.13  | 1.02 | 0.86 | 0.98 |
| 49 | U1334B | 25.86 | 12 | 1.72 | 6.98  | 1.41 | 0.84 | 2.04 |
| 50 | U1334B | 25.86 | 7  | 1.14 | 6.13  | 1.41 | 0.85 | 1.37 |
| 51 | U1334B | 25.86 | 10 | 1.32 | 7.6   | 1.41 | 0.86 | 1.60 |
| 52 | U1334B | 25.86 | 11 | 1.54 | 7.14  | 1.41 | 0.83 | 1.80 |
| 53 | U1334B | 25.86 | 10 | 1.47 | 6.81  | 1.41 | 0.77 | 1.60 |
| 54 | U1334B | 25.86 | 11 | 1.63 | 6.73  | 1.41 | 0.76 | 1.74 |
| 55 | U1334B | 25.86 | 9  | 1.35 | 6.68  | 1.41 | 0.76 | 1.44 |
| 56 | U1334B | 25.86 | 1  | 0.14 | 7.15  | 1.41 | 0.78 | 0.15 |
| 57 | U1334B | 25.86 | 10 | 1.25 | 7.97  | 1.41 | 0.78 | 1.38 |
| 58 | U1334B | 25.86 | 9  | 1.18 | 7.62  | 1.41 | 0.83 | 1.38 |
| 59 | U1334B | 25.86 | 4  | 0.68 | 5.87  | 1.41 | 0.73 | 0.70 |
| 60 | U1334B | 25.86 | 14 | 1.93 | 7.24  | 1.41 | 0.78 | 2.13 |
| 61 | U1334B | 25.86 | 7  | 0.73 | 9.61  | 1.41 | 0.84 | 0.86 |
| 62 | U1334B | 25.86 | 8  | 1.09 | 7.35  | 1.41 | 0.86 | 1.32 |
| 63 | U1334B | 25.86 | 17 | 1.85 | 9.19  | 1.41 | 0.92 | 2.40 |
| 64 | U1334B | 25.86 | 9  | 1.17 | 7.66  | 1.94 | 0.94 | 2.13 |
| 65 | U1334B | 25.86 | 8  | 0.95 | 8.38  | 1.94 | 0.96 | 1.77 |
| 66 | U1334B | 25.86 | 9  | 1.24 | 7.23  | 1.94 | 0.96 | 2.32 |
| 67 | U1334B | 25.86 | 11 | 1.34 | 8.23  | 1.94 | 0.95 | 2.45 |
| 68 | U1334B | 25.86 | 13 | 1.52 | 8.54  | 1.94 | 0.94 | 2.77 |
| 69 | U1334B | 25.86 | 7  | 0.74 | 9.47  | 1.94 | 0.94 | 1.34 |
| 70 | U1334B | 25.86 | 7  | 0.84 | 8.32  | 1.94 | 0.95 | 1.54 |
| 71 | U1334B | 25.86 | 13 | 1.33 | 9.77  | 1.94 | 0.94 | 2.43 |
| 72 | U1334B | 25.86 | 8  | 1.04 | 7.66  | 1.94 | 0.92 | 1.86 |
| 73 | U1334B | 25.86 | 12 | 1.30 | 9.22  | 1.94 | 0.93 | 2.34 |
| 74 | U1334B | 25.86 | 9  | 1.02 | 8.8   | 1.94 | 0.94 | 1.87 |
| 75 | U1334B | 25.86 | 26 | 2.75 | 9.47  | 1.94 | 1.01 | 5.35 |
| 76 | U1334B | 25.86 | 17 | 1.95 | 8.73  | 1.94 | 0.95 | 3.60 |
| 77 | U1334B | 25.86 | 16 | 1.98 | 8.09  | 1.94 | 0.97 | 3.70 |
| 78 | U1334B | 25.86 | 10 | 1.16 | 8.6   | 1.94 | 0.97 | 2.18 |
| 79 | U1334B | 25.86 | 10 | 1.11 | 9.01  | 1.94 | 0.95 | 2.04 |
| 80 | U1334B | 25.86 | 15 | 1.48 | 10.13 | 1.94 | 1.00 | 2.87 |
| 81 | U1334B | 25.86 | 30 | 3.21 | 9.35  | 2.01 | 1.01 | 6.53 |
| 82 | U1334B | 25.86 | 38 | 4.02 | 9.46  | 2.01 | 1.01 | 8.16 |
| 83 | U1334B | 25.86 | 17 | 2.08 | 8.16  | 2.01 | 0.99 | 4.14 |
| 84 | U1334B | 25.86 | 13 | 1.50 | 8.66  | 2.01 | 0.97 | 2.94 |
| 85 | U1334B | 25.86 | 15 | 1.66 | 9.01  | 2.01 | 0.96 | 3.21 |
| 86 | U1334C | 25.86 | 33 | 1.85 | 17.88 | 2.01 | 0.98 | 3.64 |
| 87 | U1334C | 25.86 | 33 | 1.94 | 17.03 | 2.01 | 1.02 | 3.96 |
| 88 | U1334C | 25.86 | 35 | 1.91 | 18.37 | 2.01 | 1.05 | 4.02 |
| 89 | U1334C | 25.86 | 69 | 3.96 | 17.44 | 2.01 | 1.02 | 8.15 |
| 90 | U1334C | 25.86 | 35 | 1.91 | 18.37 | 2.01 | 0.99 | 3.80 |
| 91 | U1334C | 25.86 | 29 | 1.69 | 17.17 | 2.01 | 0.99 | 3.37 |
| 92 | U1334C | 25.86 | 35 | 2.07 | 16.88 | 2.01 | 0.99 | 4.11 |

|            |        |       |    |      |       |      |      |      |
|------------|--------|-------|----|------|-------|------|------|------|
| <b>93</b>  | U1334C | 25.86 | 62 | 3.65 | 16.98 | 2.01 | 0.98 | 7.17 |
| <b>94</b>  | U1334C | 25.86 | 54 | 3.00 | 18.02 | 2.01 | 0.98 | 5.91 |
| <b>95</b>  | U1334C | 25.86 | 35 | 2.15 | 16.27 | 2.01 | 0.96 | 4.16 |
| <b>96</b>  | U1334C | 25.86 | 52 | 2.99 | 17.37 | 2.01 | 0.99 | 5.93 |
| <b>97</b>  | U1334C | 25.86 | 51 | 2.90 | 17.6  | 2.01 | 1.00 | 5.85 |
| <b>98</b>  | U1334C | 25.86 | 28 | 1.55 | 18.04 | 2.01 | 0.98 | 3.07 |
| <b>99</b>  | U1334C | 25.86 | 22 | 1.25 | 17.6  | 2.01 | 0.97 | 2.43 |
| <b>100</b> | U1334C | 25.86 | 18 | 1.01 | 17.82 | 2.01 | 0.95 | 1.93 |
| <b>101</b> | U1334C | 25.86 | 31 | 1.70 | 18.28 | 2.01 | 1.00 | 3.40 |
| <b>102</b> | U1334C | 25.86 | 21 | 1.32 | 15.86 | 2.01 | 1.00 | 2.65 |
| <b>103</b> | U1334C | 25.86 | 48 | 3.65 | 13.16 | 2.01 | 0.94 | 6.92 |
| <b>104</b> | U1334C | 25.86 | 43 | 2.63 | 16.35 | 2.01 | 0.95 | 5.01 |
| <b>105</b> | U1334C | 25.86 | 39 | 3.03 | 12.88 | 2.01 | 0.95 | 5.78 |
| <b>106</b> | U1334C | 25.86 | 62 | 3.53 | 17.55 | 2.01 | 0.96 | 6.80 |
| <b>107</b> | U1334C | 25.86 | 31 | 2.80 | 11.07 | 1.75 | 0.96 | 4.69 |
| <b>108</b> | U1334C | 25.86 | 44 | 2.44 | 18.02 | 1.75 | 0.95 | 4.06 |
| <b>109</b> | U1334C | 25.86 | 54 | 2.62 | 20.62 | 1.75 | 0.97 | 4.44 |
| <b>110</b> | U1334C | 25.86 | 40 | 2.44 | 16.41 | 1.75 | 0.95 | 4.07 |
| <b>111</b> | U1334C | 25.86 | 24 | 1.79 | 13.41 | 1.75 | 0.92 | 2.88 |
| <b>112</b> | U1334C | 25.86 | 14 | 1.00 | 14.04 | 1.75 | 0.92 | 1.61 |
| <b>113</b> | U1334C | 25.86 | 19 | 1.62 | 11.74 | 1.75 | 0.79 | 2.23 |
| <b>114</b> | U1334C | 25.86 | 10 | 0.93 | 10.75 | 1.75 | 0.75 | 1.22 |
| <b>115</b> | U1334C | 25.86 | 15 | 1.32 | 11.36 | 1.75 | 0.73 | 1.68 |
| <b>116</b> | U1334C | 25.86 | 7  | 0.66 | 10.59 | 1.75 | 0.66 | 0.76 |
| <b>117</b> | U1334C | 25.86 | 12 | 1.04 | 11.56 | 1.75 | 0.75 | 1.36 |
| <b>118</b> | U1334C | 25.86 | 17 | 2.05 | 8.28  | 1.75 | 0.77 | 2.78 |
| <b>119</b> | U1334C | 25.86 | 19 | 1.80 | 10.58 | 1.75 | 0.86 | 2.71 |
| <b>120</b> | U1334C | 25.86 | 27 | 2.68 | 10.09 | 1.75 | 0.96 | 4.52 |
| <b>121</b> | U1334C | 25.86 | 30 | 2.78 | 10.78 | 1.75 | 0.93 | 4.51 |
| <b>122</b> | U1334C | 25.86 | 51 | 5.16 | 9.88  | 1.75 | 0.93 | 8.38 |
| <b>123</b> | U1334C | 25.86 | 29 | 2.83 | 10.23 | 1.75 | 0.87 | 4.30 |
| <b>124</b> | U1334C | 25.86 | 20 | 2.38 | 8.41  | 1.75 | 0.83 | 3.44 |
| <b>125</b> | U1334C | 25.86 | 22 | 1.73 | 12.71 | 1.75 | 0.86 | 2.62 |
| <b>126</b> | U1334C | 25.86 | 12 | 0.97 | 12.41 | 1.75 | 0.91 | 1.55 |
| <b>127</b> | U1334C | 25.86 | 43 | 3.37 | 12.76 | 1.75 | 0.97 | 5.70 |
| <b>128</b> | U1334C | 25.86 | 34 | 3.46 | 9.82  | 1.60 | 0.95 | 5.29 |
| <b>129</b> | U1334C | 25.86 | 24 | 2.03 | 11.84 | 1.60 | 0.91 | 2.95 |
| <b>130</b> | U1334C | 25.86 | 21 | 1.96 | 10.74 | 1.60 | 0.95 | 2.96 |
| <b>131</b> | U1334C | 25.86 | 20 | 1.58 | 12.67 | 1.60 | 0.96 | 2.42 |
| <b>132</b> | U1334C | 25.86 | 32 | 2.36 | 13.56 | 1.60 | 0.98 | 3.70 |
| <b>133</b> | U1334C | 25.86 | 36 | 2.93 | 12.29 | 1.60 | 0.98 | 4.57 |
| <b>134</b> | U1334C | 25.86 | 27 | 2.26 | 11.96 | 1.60 | 0.94 | 3.39 |
| <b>135</b> | U1334C | 25.86 | 18 | 1.73 | 10.43 | 1.60 | 0.92 | 2.55 |
| <b>136</b> | U1334C | 25.86 | 20 | 1.68 | 11.91 | 1.60 | 0.96 | 2.57 |
| <b>137</b> | U1334C | 25.86 | 17 | 1.65 | 10.3  | 1.60 | 0.97 | 2.57 |
| <b>138</b> | U1334C | 25.86 | 14 | 1.35 | 10.37 | 1.60 | 1.02 | 2.21 |
| <b>139</b> | U1334C | 25.86 | 14 | 1.49 | 9.39  | 1.60 | 1.03 | 2.47 |

|     |        |       |    |      |       |      |      |      |
|-----|--------|-------|----|------|-------|------|------|------|
| 140 | U1334C | 25.86 | 22 | 1.48 | 14.82 | 1.60 | 1.03 | 2.44 |
| 141 | U1334C | 25.86 | 31 | 2.37 | 13.07 | 1.60 | 1.00 | 3.80 |
| 142 | U1334C | 25.86 | 14 | 1.06 | 13.2  | 1.60 | 1.05 | 1.78 |
| 143 | U1334C | 25.86 | 22 | 1.55 | 14.21 | 1.60 | 1.10 | 2.73 |
| 144 | U1334C | 25.86 | 19 | 1.43 | 13.29 | 1.60 | 1.12 | 2.57 |
| 145 | U1334C | 25.86 | 30 | 2.20 | 13.61 | 1.75 | 1.10 | 4.23 |
| 146 | U1334C | 25.86 | 15 | 1.08 | 13.84 | 1.75 | 1.10 | 2.09 |
| 147 | U1334C | 25.86 | 37 | 2.68 | 13.79 | 1.75 | 1.12 | 5.26 |
| 148 | U1334C | 25.86 | 18 | 0.79 | 22.74 | 1.75 | 1.13 | 1.56 |
| 149 | U1334C | 25.86 | 28 | 2.26 | 12.41 | 1.75 | 1.12 | 4.39 |
| 150 | U1334C | 25.86 | 29 | 1.94 | 14.98 | 1.75 | 1.05 | 3.56 |
| 151 | U1334C | 25.86 | 22 | 1.73 | 12.72 | 1.75 | 1.07 | 3.23 |
| 152 | U1334C | 25.86 | 42 | 2.95 | 14.22 | 1.75 | 1.08 | 5.58 |
| 153 | U1334C | 25.86 | 34 | 2.75 | 12.37 | 1.75 | 1.03 | 4.95 |
| 154 | U1334C | 25.86 | 18 | 1.40 | 12.85 | 1.75 | 1.02 | 2.50 |
| 155 | U1334C | 25.86 | 45 | 3.61 | 12.46 | 1.75 | 0.98 | 6.17 |
| 156 | U1334C | 25.86 | 23 | 1.35 | 17.03 | 1.75 | 1.04 | 2.46 |
| 157 | U1334C | 25.86 | 6  | 0.51 | 11.66 | 1.75 | 1.00 | 0.90 |
| 158 | U1334C | 25.86 | 39 | 3.67 | 10.64 | 1.75 | 0.96 | 6.14 |
| 159 | U1334B | 25.86 | 30 | 2.42 | 12.39 | 1.75 | 0.97 | 4.12 |
| 160 | U1334B | 25.86 | 31 | 2.40 | 12.92 | 1.02 | 1.01 | 2.49 |
| 161 | U1334B | 25.86 | 13 | 1.52 | 8.54  | 1.02 | 0.97 | 1.50 |
| 162 | U1334B | 25.86 | 14 | 1.21 | 11.54 | 1.02 | 0.99 | 1.22 |
| 163 | U1334B | 25.86 | 13 | 1.27 | 10.2  | 1.02 | 1.00 | 1.30 |
| 164 | U1334B | 25.86 | 46 | 2.85 | 16.16 | 1.02 | 0.96 | 2.79 |
| 165 | U1334B | 25.86 | 24 | 1.86 | 12.87 | 1.02 | 0.98 | 1.87 |
| 166 | U1334B | 25.86 | 23 | 2.02 | 11.4  | 1.02 | 0.98 | 2.01 |
| 167 | U1334B | 25.86 | 31 | 2.33 | 13.29 | 1.02 | 0.97 | 2.31 |
| 168 | U1334B | 25.86 | 28 | 2.23 | 12.58 | 1.02 | 0.98 | 2.23 |
| 169 | U1334B | 25.86 | 23 | 1.89 | 12.14 | 1.02 | 1.00 | 1.93 |
| 170 | U1334B | 25.86 | 38 | 2.99 | 12.71 | 1.02 | 1.00 | 3.07 |
| 171 | U1334B | 25.86 | 30 | 2.56 | 11.74 | 1.02 | 0.93 | 2.42 |
| 172 | U1334B | 25.86 | 47 | 4.04 | 11.64 | 1.02 | 0.96 | 3.95 |
| 173 | U1334B | 25.86 | 18 | 1.41 | 12.74 | 1.02 | 0.98 | 1.41 |
| 174 | U1334B | 25.86 | 29 | 2.05 | 14.16 | 1.02 | 0.99 | 2.07 |
| 175 | U1334B | 25.86 | 40 | 3.75 | 10.68 | 1.02 | 0.94 | 3.61 |
| 176 | U1334B | 25.86 | 57 | 4.81 | 11.85 | 1.02 | 0.95 | 4.69 |
| 177 | U1334B | 25.86 | 46 | 3.87 | 11.88 | 1.02 | 0.99 | 3.91 |
| 178 | U1334B | 25.86 | 38 | 3.36 | 11.3  | 1.73 | 0.96 | 5.57 |
| 179 | U1334B | 25.86 | 58 | 4.75 | 12.2  | 1.73 | 0.97 | 7.99 |
| 180 | U1334B | 25.86 | 38 | 4.24 | 8.97  | 1.73 | 0.95 | 6.94 |
| 181 | U1334B | 25.86 | 39 | 3.96 | 9.84  | 1.73 | 0.95 | 6.52 |
| 182 | U1334B | 25.86 | 17 | 2.46 | 6.92  | 1.73 | 0.89 | 3.78 |
| 183 | U1334B | 25.86 | 34 | 3.46 | 9.82  | 1.73 | 0.91 | 5.44 |
| 184 | U1334B | 25.86 | 19 | 3.01 | 6.32  | 1.73 | 0.93 | 4.86 |
| 185 | U1334B | 25.86 | 30 | 3.19 | 9.41  | 1.73 | 0.93 | 5.13 |
| 186 | U1334B | 25.86 | 17 | 1.74 | 9.75  | 1.73 | 0.91 | 2.76 |

|     |        |       |    |      |       |      |      |      |
|-----|--------|-------|----|------|-------|------|------|------|
| 187 | U1334B | 25.86 | 7  | 0.81 | 8.67  | 1.73 | 0.95 | 1.33 |
| 188 | U1334B | 25.86 | 17 | 2.46 | 6.92  | 1.73 | 0.93 | 3.97 |
| 189 | U1334B | 25.86 | 14 | 1.65 | 8.47  | 1.73 | 0.92 | 2.62 |
| 190 | U1334B | 25.86 | 15 | 1.85 | 8.1   | 1.73 | 0.87 | 2.78 |
| 191 | U1334B | 25.86 | 18 | 1.60 | 11.25 | 1.73 | 0.86 | 2.37 |
| 192 | U1334B | 25.86 | 7  | 1.62 | 4.33  | 1.73 | 0.87 | 2.43 |
| 193 | U1334B | 25.86 | 21 | 2.10 | 9.98  | 1.73 | 0.89 | 3.23 |
| 194 | U1334B | 25.86 | 24 | 2.36 | 10.18 | 1.73 | 0.90 | 3.69 |
| 195 | U1334B | 25.86 | 30 | 2.26 | 13.3  | 1.73 | 0.92 | 3.60 |
| 196 | U1334B | 25.86 | 19 | 1.90 | 10.01 | 1.73 | 0.90 | 2.94 |
| 197 | U1334B | 25.86 | 12 | 1.20 | 10.02 | 1.73 | 0.89 | 1.85 |
| 198 | U1334B | 25.86 | 13 | 1.22 | 10.62 | 1.73 | 0.86 | 1.81 |
| 199 | U1334B | 25.86 | 11 | 1.30 | 8.46  | 1.73 | 0.87 | 1.95 |
| 200 | U1334B | 25.86 | 11 | 1.34 | 8.23  | 1.73 | 0.87 | 2.02 |
| 201 | U1334B | 25.86 | 16 | 1.63 | 9.83  | 1.73 | 0.89 | 2.49 |
| 202 | U1334B | 25.86 | 7  | 0.50 | 13.88 | 1.73 | 0.88 | 0.77 |
| 203 | U1334B | 25.86 | 12 | 1.08 | 11.14 | 1.73 | 0.88 | 1.63 |
| 204 | U1334B | 25.86 | 12 | 1.31 | 9.18  | 1.73 | 0.85 | 1.93 |
| 205 | U1334B | 25.86 | 7  | 0.60 | 11.62 | 1.73 | 0.86 | 0.89 |
| 206 | U1334B | 25.86 | 7  | 0.66 | 10.68 | 1.73 | 0.89 | 1.01 |
| 207 | U1334B | 25.86 | 8  | 0.64 | 12.51 | 1.73 | 0.94 | 1.04 |
| 208 | U1334B | 25.86 | 11 | 0.90 | 12.19 | 1.73 | 0.94 | 1.46 |
| 209 | U1334B | 25.86 | 13 | 1.25 | 10.38 | 1.73 | 0.99 | 2.14 |
| 210 | U1334B | 25.86 | 16 | 0.93 | 17.24 | 1.73 | 0.95 | 1.52 |
| 211 | U1334B | 25.86 | 16 | 0.93 | 17.14 | 1.73 | 0.88 | 1.42 |
| 212 | U1334B | 25.86 | 11 | 0.62 | 17.63 | 1.73 | 0.90 | 0.98 |
| 213 | U1334B | 25.86 | 28 | 1.55 | 18.02 | 1.15 | 0.98 | 1.74 |
| 214 | U1334B | 25.86 | 27 | 1.47 | 18.35 | 1.15 | 0.95 | 1.60 |
| 215 | U1334B | 25.86 | 16 | 0.99 | 16.15 | 1.15 | 0.92 | 1.04 |
| 216 | U1334B | 25.86 | 30 | 1.73 | 17.3  | 1.15 | 0.90 | 1.80 |
| 217 | U1334B | 25.86 | 23 | 1.30 | 17.68 | 1.15 | 0.89 | 1.32 |
| 218 | U1334B | 25.86 | 23 | 1.43 | 16.08 | 1.15 | 0.89 | 1.47 |
| 219 | U1334B | 25.86 | 36 | 1.48 | 24.26 | 1.15 | 0.87 | 1.47 |
| 220 | U1334B | 25.86 | 31 | 1.29 | 24.01 | 1.15 | 0.89 | 1.31 |
| 221 | U1334B | 25.86 | 27 | 1.22 | 22.11 | 1.15 | 0.87 | 1.22 |
| 222 | U1334B | 25.86 | 27 | 1.19 | 22.71 | 1.15 | 0.86 | 1.17 |
| 223 | U1334B | 25.86 | 43 | 1.87 | 23.01 | 1.15 | 0.83 | 1.78 |
| 224 | U1334B | 25.86 | 9  | 0.65 | 13.92 | 1.15 | 0.85 | 0.63 |
| 225 | U1334B | 25.86 | 24 | 1.46 | 16.48 | 1.15 | 0.87 | 1.46 |
| 226 | U1334B | 25.86 | 50 | 3.32 | 15.08 | 1.15 | 0.89 | 3.36 |
| 227 | U1334B | 25.86 | 25 | 1.60 | 15.66 | 1.15 | 0.83 | 1.51 |
| 228 | U1334B | 25.86 | 14 | 0.96 | 14.51 | 1.15 | 0.84 | 0.92 |
| 229 | U1334B | 25.86 | 24 | 1.51 | 15.91 | 1.15 | 0.77 | 1.33 |
| 230 | U1334B | 25.86 | 12 | 0.80 | 15.01 | 1.15 | 0.76 | 0.69 |
| 231 | U1334B | 25.86 | 21 | 1.56 | 13.44 | 1.15 | 0.75 | 1.34 |
| 232 | U1334B | 25.86 | 12 | 0.68 | 17.73 | 1.15 | 0.70 | 0.54 |
| 233 | U1334B | 25.86 | 34 | 1.78 | 19.15 | 1.15 | 0.77 | 1.57 |

|            |        |       |    |      |       |      |      |      |
|------------|--------|-------|----|------|-------|------|------|------|
| <b>234</b> | U1334B | 25.86 | 37 | 1.69 | 21.95 | 1.15 | 0.82 | 1.59 |
| <b>235</b> | U1334B | 25.86 | 43 | 1.74 | 24.7  | 1.15 | 0.89 | 1.78 |
| <b>236</b> | U1334B | 25.86 | 32 | 1.38 | 23.22 | 1.15 | 0.92 | 1.45 |
| <b>237</b> | U1334C | 25.86 | 32 | 1.89 | 16.91 | 1.54 | 0.92 | 2.69 |
| <b>238</b> | U1334C | 25.86 | 29 | 1.77 | 16.42 | 1.54 | 0.92 | 2.50 |
| <b>239</b> | U1334C | 25.86 | 76 | 2.52 | 30.15 | 1.54 | 0.92 | 3.57 |
| <b>240</b> | U1334C | 25.86 | 77 | 3.21 | 24.02 | 1.54 | 0.89 | 4.41 |
| <b>241</b> | U1334C | 25.86 | 36 | 1.49 | 24.13 | 1.54 | 0.89 | 2.04 |
| <b>242</b> | U1334C | 25.86 | 34 | 1.34 | 25.41 | 1.54 | 0.90 | 1.86 |
| <b>243</b> | U1334C | 25.86 | 16 | 0.72 | 22.15 | 1.54 | 0.89 | 0.98 |
| <b>244</b> | U1334C | 25.86 | 21 | 0.75 | 28.15 | 1.54 | 0.86 | 0.99 |
| <b>245</b> | U1334C | 25.86 | 26 | 1.09 | 23.91 | 1.54 | 0.89 | 1.49 |
| <b>246</b> | U1334C | 25.86 | 34 | 1.46 | 23.32 | 1.54 | 0.88 | 1.97 |
| <b>247</b> | U1334C | 25.86 | 50 | 2.32 | 21.52 | 1.54 | 0.84 | 2.98 |
| <b>248</b> | U1334C | 25.86 | 33 | 1.31 | 25.16 | 1.54 | 0.82 | 1.66 |
| <b>249</b> | U1334C | 25.86 | 49 | 2.11 | 23.21 | 1.54 | 0.78 | 2.54 |
| <b>250</b> | U1334C | 25.86 | 35 | 1.76 | 19.87 | 1.54 | 0.83 | 2.23 |
| <b>251</b> | U1334C | 25.86 | 37 | 1.43 | 25.93 | 1.54 | 0.92 | 2.01 |
| <b>252</b> | U1334C | 25.86 | 40 | 1.55 | 25.83 | 1.54 | 0.92 | 2.20 |
| <b>253</b> | U1334C | 25.86 | 44 | 1.68 | 26.25 | 1.54 | 0.88 | 2.26 |
| <b>254</b> | U1334C | 25.86 | 41 | 1.48 | 27.67 | 1.54 | 0.91 | 2.08 |
| <b>255</b> | U1334C | 25.86 | 49 | 1.49 | 32.92 | 1.54 | 0.95 | 2.18 |
| <b>256</b> | U1334C | 25.86 | 54 | 1.84 | 29.35 | 1.54 | 0.97 | 2.75 |
| <b>257</b> | U1334C | 25.86 | 40 | 1.63 | 24.59 | 1.54 | 0.99 | 2.48 |
| <b>258</b> | U1334C | 25.86 | 51 | 1.71 | 29.91 | 1.54 | 1.00 | 2.63 |
| <b>259</b> | U1334C | 25.86 | 53 | 2.39 | 22.21 | 1.54 | 0.97 | 3.56 |
| <b>260</b> | U1334C | 25.86 | 51 | 2.03 | 25.16 | 1.54 | 1.02 | 3.18 |
| <b>261</b> | U1334C | 25.86 | 40 | 1.66 | 24.1  | 1.54 | 1.05 | 2.67 |
| <b>262</b> | U1334C | 25.86 | 40 | 1.52 | 26.24 | 1.54 | 1.06 | 2.49 |
| <b>263</b> | U1334C | 25.86 | 46 | 1.87 | 24.66 | 1.54 | 1.08 | 3.09 |
| <b>264</b> | U1334C | 25.86 | 54 | 2.12 | 25.46 | 1.54 | 1.10 | 3.58 |
| <b>265</b> | U1334C | 25.86 | 70 | 2.61 | 26.82 | 1.54 | 1.14 | 4.55 |
| <b>266</b> | U1334C | 25.86 | 61 | 1.07 | 57.1  | 2.20 | 1.27 | 2.98 |
| <b>267</b> | U1334C | 25.86 | 27 | 1.20 | 22.51 | 2.20 | 1.23 | 3.25 |
| <b>268</b> | U1334C | 25.86 | 37 | 1.54 | 23.96 | 2.20 | 1.33 | 4.52 |
| <b>269</b> | U1334C | 25.86 | 42 | 1.78 | 23.6  | 2.20 | 1.23 | 4.83 |
| <b>270</b> | U1334C | 25.86 | 31 | 1.39 | 22.23 | 2.20 | 1.20 | 3.67 |
| <b>271</b> | U1334C | 25.86 | 35 | 1.56 | 22.44 | 2.20 | 1.11 | 3.82 |
| <b>272</b> | U1334C | 25.86 | 35 | 1.82 | 19.23 | 2.20 | 1.11 | 4.43 |
| <b>273</b> | U1334C | 25.86 | 48 | 2.47 | 19.41 | 2.20 | 1.09 | 5.95 |
| <b>274</b> | U1334C | 25.86 | 20 | 0.90 | 22.26 | 2.20 | 1.12 | 2.21 |
| <b>275</b> | U1334C | 25.86 | 61 | 2.93 | 20.81 | 2.20 | 1.10 | 7.10 |
| <b>276</b> | U1334C | 25.86 | 34 | 1.54 | 22.14 | 2.20 | 1.09 | 3.67 |
| <b>277</b> | U1334C | 25.86 | 47 | 2.07 | 22.73 | 2.20 | 1.17 | 5.30 |
| <b>278</b> | U1334C | 25.86 | 31 | 1.21 | 25.55 | 2.20 | 1.12 | 3.00 |
| <b>279</b> | U1334C | 25.86 | 34 | 1.50 | 22.67 | 2.20 | 1.04 | 3.42 |
| <b>280</b> | U1334C | 25.86 | 47 | 2.00 | 23.55 | 2.20 | 1.01 | 4.41 |

|            |        |       |     |       |       |      |      |       |
|------------|--------|-------|-----|-------|-------|------|------|-------|
| <b>281</b> | U1334C | 25.86 | 39  | 1.50  | 26.02 | 2.20 | 0.99 | 3.26  |
| <b>282</b> | U1334C | 25.86 | 33  | 1.41  | 23.42 | 2.20 | 1.00 | 3.09  |
| <b>283</b> | U1334C | 25.86 | 29  | 1.45  | 20.05 | 2.20 | 0.97 | 3.09  |
| <b>284</b> | U1334C | 25.86 | 34  | 1.34  | 25.4  | 2.20 | 0.99 | 2.92  |
| <b>285</b> | U1334C | 25.86 | 40  | 1.70  | 23.58 | 2.20 | 1.01 | 3.75  |
| <b>286</b> | U1334C | 25.86 | 34  | 1.13  | 30.15 | 2.20 | 1.00 | 2.48  |
| <b>287</b> | U1334C | 25.86 | 28  | 1.03  | 27.14 | 2.20 | 0.96 | 2.18  |
| <b>288</b> | U1334C | 25.86 | 25  | 0.84  | 29.67 | 2.20 | 0.96 | 1.77  |
| <b>289</b> | U1334C | 25.86 | 31  | 1.08  | 28.8  | 2.20 | 0.95 | 2.25  |
| <b>290</b> | U1334C | 25.86 | 18  | 0.63  | 28.68 | 2.20 | 0.94 | 1.29  |
| <b>291</b> | U1334C | 25.86 | 17  | 0.70  | 24.44 | 2.20 | 0.91 | 1.39  |
| <b>292</b> | U1334C | 25.86 | 29  | 1.10  | 26.25 | 2.20 | 0.87 | 2.10  |
| <b>293</b> | U1334C | 25.86 | 32  | 1.16  | 27.67 | 2.20 | 0.92 | 2.33  |
| <b>294</b> | U1334C | 25.86 | 14  | 0.50  | 27.92 | 2.20 | 0.92 | 1.02  |
| <b>295</b> | U1334C | 25.86 | 31  | 1.28  | 24.25 | 2.20 | 0.92 | 2.58  |
| <b>296</b> | U1334C | 25.86 | 20  | 1.23  | 16.29 | 2.20 | 0.94 | 2.53  |
| <b>297</b> | U1334C | 25.86 | 16  | 0.93  | 17.14 | 2.20 | 0.95 | 1.94  |
| <b>298</b> | U1334C | 25.86 | 16  | 0.96  | 16.67 | 1.48 | 0.95 | 1.35  |
| <b>299</b> | U1334C | 25.86 | 22  | 1.25  | 17.57 | 1.35 | 0.96 | 1.62  |
| <b>300</b> | U1334C | 25.86 | 25  | 1.36  | 18.43 | 1.35 | 0.94 | 1.72  |
| <b>301</b> | U1334C | 25.86 | 16  | 0.89  | 18.05 | 1.35 | 0.91 | 1.08  |
| <b>302</b> | U1334C | 25.86 | 25  | 1.34  | 18.6  | 1.35 | 0.91 | 1.65  |
| <b>303</b> | U1334C | 25.86 | 23  | 1.41  | 16.33 | 1.35 | 0.91 | 1.73  |
| <b>304</b> | U1334C | 25.86 | 24  | 1.43  | 16.76 | 1.35 | 0.89 | 1.72  |
| <b>305</b> | U1334C | 25.86 | 8   | 0.49  | 16.31 | 1.35 | 0.86 | 0.57  |
| <b>306</b> | U1334C | 25.86 | 15  | 0.88  | 16.96 | 1.35 | 0.90 | 1.08  |
| <b>307</b> | U1334C | 25.86 | 5   | 0.30  | 16.6  | 1.35 | 0.90 | 0.37  |
| <b>308</b> | U1334C | 25.86 | 13  | 0.74  | 17.64 | 1.35 | 0.88 | 0.87  |
| <b>309</b> | U1334C | 25.86 | 18  | 0.83  | 21.61 | 1.35 | 0.90 | 1.01  |
| <b>310</b> | U1334C | 25.86 | 11  | 0.44  | 25.07 | 1.35 | 0.93 | 0.55  |
| <b>311</b> | U1334C | 25.86 | 17  | 0.65  | 26.21 | 1.35 | 0.92 | 0.81  |
| <b>312</b> | U1334C | 25.86 | 11  | 0.50  | 21.97 | 1.35 | 0.86 | 0.58  |
| <b>313</b> | U1334C | 25.86 | 22  | 1.21  | 18.13 | 1.35 | 0.90 | 1.48  |
| <b>314</b> | U1334C | 25.86 | 16  | 0.82  | 19.44 | 1.35 | 0.89 | 0.99  |
| <b>315</b> | U1334C | 25.86 | 32  | 1.41  | 22.76 | 1.35 | 0.84 | 1.59  |
| <b>316</b> | U1334C | 25.86 | 17  | 0.80  | 21.19 | 1.35 | 0.86 | 0.93  |
| <b>317</b> | U1334C | 25.86 | 12  | 0.54  | 22.3  | 1.35 | 0.81 | 0.59  |
| <b>318</b> | U1334C | 25.86 | 13  | 0.57  | 22.64 | 1.35 | 0.81 | 0.62  |
| <b>319</b> | U1334C | 25.86 | 14  | 0.74  | 18.9  | 1.35 | 0.79 | 0.79  |
| <b>320</b> | U1334C | 25.86 | 19  | 1.24  | 15.3  | 1.35 | 0.84 | 1.40  |
| <b>321</b> | U1334C | 25.86 | 20  | 0.91  | 21.89 | 1.35 | 0.85 | 1.04  |
| <b>322</b> | U1334C | 25.86 | 16  | 0.87  | 18.4  | 1.35 | 0.84 | 0.98  |
| <b>323</b> | U1334C | 25.86 | 14  | 0.76  | 18.54 | 1.35 | 0.83 | 0.84  |
| <b>324</b> | U1334C | 25.86 | 25  | 1.10  | 22.68 | 1.35 | 0.89 | 1.33  |
| <b>325</b> | U1334C | 25.86 | 32  | 1.33  | 24.15 | 1.35 | 0.91 | 1.62  |
| <b>326</b> | U1334C | 25.86 | 66  | 2.50  | 26.41 | 2.06 | 0.96 | 4.95  |
| <b>327</b> | U1334C | 25.86 | 665 | 25.16 | 26.43 | 2.06 | 0.93 | 48.49 |

|            |        |       |    |      |       |      |      |      |
|------------|--------|-------|----|------|-------|------|------|------|
| <b>328</b> | U1334C | 25.86 | 28 | 1.16 | 24.1  | 2.06 | 0.88 | 2.10 |
| <b>329</b> | U1334C | 25.86 | 31 | 1.39 | 22.23 | 2.06 | 0.85 | 2.44 |
| <b>330</b> | U1334C | 25.86 | 22 | 1.15 | 19.1  | 2.06 | 0.80 | 1.91 |
| <b>331</b> | U1334C | 25.86 | 12 | 0.65 | 18.51 | 2.06 | 0.79 | 1.06 |
| <b>332</b> | U1334C | 25.86 | 20 | 1.21 | 16.48 | 2.06 | 0.75 | 1.88 |
| <b>333</b> | U1334C | 25.86 | 8  | 0.53 | 15.23 | 2.06 | 0.75 | 0.81 |
| <b>334</b> | U1334C | 25.86 | 12 | 0.81 | 14.89 | 2.06 | 0.86 | 1.43 |
| <b>335</b> | U1334C | 25.86 | 21 | 0.79 | 26.43 | 2.06 | 0.93 | 1.53 |
| <b>336</b> | U1334C | 25.86 | 18 | 0.66 | 27.48 | 2.06 | 0.97 | 1.30 |
| <b>337</b> | U1334C | 25.86 | 23 | 0.89 | 25.79 | 2.06 | 0.97 | 1.79 |
| <b>338</b> | U1334C | 25.86 | 21 | 0.78 | 26.96 | 2.06 | 0.99 | 1.58 |
| <b>339</b> | U1334C | 25.86 | 36 | 1.21 | 29.85 | 2.06 | 0.99 | 2.46 |
| <b>340</b> | U1334C | 25.86 | 14 | 0.55 | 25.66 | 2.06 | 0.97 | 1.09 |
| <b>341</b> | U1334C | 25.86 | 30 | 1.31 | 22.91 | 2.06 | 0.96 | 2.60 |
| <b>342</b> | U1334C | 25.86 | 24 | 0.98 | 24.52 | 2.06 | 0.95 | 1.91 |
| <b>343</b> | U1334C | 25.86 | 13 | 0.57 | 22.9  | 2.06 | 0.93 | 1.09 |
| <b>344</b> | U1334C | 25.86 | 15 | 0.78 | 19.15 | 2.06 | 0.91 | 1.47 |
| <b>345</b> | U1334C | 25.86 | 23 | 1.04 | 22.01 | 2.06 | 0.91 | 1.95 |
| <b>346</b> | U1334C | 25.86 | 12 | 0.58 | 20.84 | 2.06 | 0.90 | 1.06 |
| <b>347</b> | U1334C | 25.86 | 39 | 1.87 | 20.86 | 2.06 | 0.93 | 3.58 |
| <b>348</b> | U1334C | 25.86 | 19 | 0.66 | 28.78 | 2.06 | 0.94 | 1.28 |
| <b>349</b> | U1334C | 25.86 | 32 | 1.17 | 27.42 | 2.06 | 0.90 | 2.17 |
| <b>350</b> | U1334C | 25.86 | 24 | 0.89 | 27.05 | 2.06 | 0.88 | 1.60 |
| <b>351</b> | U1334C | 25.86 | 41 | 1.46 | 28.01 | 2.06 | 0.88 | 2.66 |
| <b>352</b> | U1334C | 25.86 | 31 | 1.06 | 29.19 | 2.06 | 0.93 | 2.03 |
| <b>353</b> | U1334C | 25.86 | 63 | 2.13 | 29.64 | 2.06 | 0.92 | 4.04 |
| <b>354</b> | U1334C | 25.86 | 48 | 1.73 | 27.76 | 2.06 | 0.94 | 3.34 |
| <b>355</b> | U1334C | 25.86 | 38 | 1.39 | 27.37 | 2.06 | 0.94 | 2.70 |
| <b>356</b> | U1334C | 25.86 | 24 | 1.12 | 21.45 | 2.06 | 0.93 | 2.15 |
| <b>357</b> | U1334C | 25.86 | 16 | 0.73 | 21.78 | 2.06 | 0.93 | 1.42 |
| <b>358</b> | U1334C | 25.86 | 26 | 1.17 | 22.23 | 2.06 | 0.92 | 2.22 |
| <b>359</b> | U1334C | 25.86 | 25 | 0.96 | 26.11 | 2.06 | 0.95 | 1.87 |
| <b>360</b> | U1334C | 25.86 | 34 | 1.33 | 25.57 | 2.06 | 0.94 | 2.59 |
| <b>361</b> | U1334C | 25.86 | 43 | 1.56 | 27.54 | 2.06 | 0.95 | 3.06 |
| <b>362</b> | U1334C | 25.86 | 27 | 1.05 | 25.82 | 2.06 | 0.90 | 1.94 |
| <b>363</b> | U1334C | 25.86 | 30 | 1.46 | 20.56 | 2.06 | 0.84 | 2.53 |
| <b>364</b> | U1334C | 25.86 | 28 | 1.25 | 22.36 | 2.06 | 0.89 | 2.31 |
| <b>365</b> | U1334C | 25.86 | 45 | 1.90 | 23.72 | 2.06 | 0.83 | 3.24 |
| <b>366</b> | U1334C | 25.86 | 16 | 0.92 | 17.41 | 2.06 | 0.73 | 1.39 |
| <b>367</b> | U1334C | 25.86 | 23 | 1.00 | 22.98 | 2.06 | 0.76 | 1.57 |
| <b>368</b> | U1334C | 25.86 | 24 | 1.07 | 22.39 | 2.06 | 0.82 | 1.81 |
| <b>369</b> | U1334C | 25.86 | 37 | 1.63 | 22.73 | 2.06 | 0.90 | 3.04 |
| <b>370</b> | U1334C | 25.86 | 30 | 1.20 | 25.03 | 2.06 | 0.97 | 2.40 |
| <b>371</b> | U1334C | 25.86 | 29 | 1.10 | 26.45 | 2.06 | 0.90 | 2.03 |
| <b>372</b> | U1334C | 25.86 | 25 | 1.04 | 24.04 | 2.06 | 0.96 | 2.06 |
| <b>373</b> | U1334B | 25.86 | 15 | 0.81 | 18.62 | 1.38 | 1.00 | 1.11 |
| <b>374</b> | U1334B | 25.86 | 22 | 1.10 | 19.95 | 1.38 | 1.01 | 1.53 |



|     |        |       |    |      |       |      |      |      |
|-----|--------|-------|----|------|-------|------|------|------|
| 375 | U1334B | 25.86 | 29 | 1.53 | 18.99 | 1.38 | 0.93 | 1.96 |
| 376 | U1334B | 25.86 | 41 | 1.71 | 24.01 | 1.38 | 0.92 | 2.17 |
| 377 | U1334B | 25.86 | 44 | 1.79 | 24.52 | 1.38 | 0.95 | 2.36 |
| 378 | U1334B | 25.86 | 24 | 1.06 | 22.73 | 1.38 | 0.91 | 1.33 |
| 379 | U1334B | 25.86 | 40 | 1.71 | 23.36 | 1.38 | 0.88 | 2.08 |
| 380 | U1334B | 25.86 | 65 | 2.30 | 28.26 | 1.38 | 0.86 | 2.73 |
| 381 | U1334B | 25.86 | 41 | 1.63 | 25.13 | 1.38 | 0.89 | 1.99 |
| 382 | U1334B | 25.86 | 31 | 1.21 | 25.7  | 1.38 | 0.97 | 1.62 |
| 383 | U1334B | 25.86 | 30 | 1.12 | 26.75 | 1.38 | 0.97 | 1.49 |
| 384 | U1334B | 25.86 | 19 | 0.77 | 24.78 | 1.38 | 0.97 | 1.03 |
| 385 | U1334B | 25.86 | 29 | 1.20 | 24.26 | 1.38 | 0.98 | 1.62 |
| 386 | U1334B | 25.86 | 24 | 1.15 | 20.95 | 1.38 | 1.00 | 1.57 |
| 387 | U1334B | 25.86 | 24 | 0.85 | 28.26 | 1.38 | 1.00 | 1.17 |
| 388 | U1334B | 25.86 | 30 | 1.19 | 25.31 | 1.38 | 1.04 | 1.69 |
| 389 | U1334B | 25.86 | 18 | 0.83 | 21.62 | 1.38 | 1.03 | 1.18 |
| 390 | U1334B | 25.86 | 23 | 0.98 | 23.39 | 1.38 | 1.01 | 1.37 |
| 391 | U1334B | 25.86 | 17 | 1.15 | 14.72 | 1.38 | 0.98 | 1.55 |
| 392 | U1334B | 25.86 | 21 | 1.01 | 20.74 | 1.38 | 1.00 | 1.40 |
| 393 | U1334B | 25.86 | 26 | 0.97 | 26.75 | 1.38 | 1.00 | 1.34 |
| 394 | U1334B | 25.86 | 23 | 0.86 | 26.74 | 1.38 | 1.01 | 1.20 |
| 395 | U1334B | 25.86 | 26 | 1.01 | 25.85 | 1.38 | 1.00 | 1.38 |
| 396 | U1334B | 25.86 | 26 | 1.19 | 21.87 | 1.38 | 1.01 | 1.65 |
| 397 | U1334B | 25.86 | 32 | 1.20 | 26.75 | 1.38 | 1.01 | 1.67 |
| 398 | U1334B | 25.86 | 50 | 2.08 | 24.05 | 1.38 | 1.04 | 2.97 |
| 399 | U1334B | 25.86 | 29 | 1.18 | 24.53 | 1.38 | 1.00 | 1.63 |
| 400 | U1334B | 25.86 | 28 | 1.53 | 18.31 | 1.38 | 1.00 | 2.11 |
| 401 | U1334B | 25.86 | 31 | 1.02 | 30.3  | 1.38 | 1.02 | 1.44 |
| 402 | U1334B | 25.86 | 27 | 0.94 | 28.7  | 1.38 | 1.01 | 1.31 |
| 403 | U1334B | 25.86 | 22 | 1.05 | 20.99 | 1.38 | 1.02 | 1.47 |
| 404 | U1334B | 25.86 | 25 | 0.96 | 26.1  | 1.38 | 1.00 | 1.32 |
| 405 | U1334B | 25.86 | 12 | 0.48 | 25.22 | 1.38 | 0.99 | 0.65 |
| 406 | U1334B | 25.86 | 42 | 1.49 | 28.23 | 1.38 | 0.99 | 2.02 |
| 407 | U1334B | 25.86 | 55 | 2.06 | 26.73 | 1.38 | 0.97 | 2.76 |
| 408 | U1334B | 25.86 | 39 | 1.23 | 31.6  | 1.38 | 0.99 | 1.69 |
| 409 | U1334B | 25.86 | 45 | 1.71 | 26.32 | 1.38 | 1.00 | 2.35 |
| 410 | U1334B | 25.86 | 55 | 2.12 | 25.99 | 2.44 | 0.99 | 5.10 |
| 411 | U1334B | 25.86 | 37 | 1.38 | 26.74 | 2.44 | 1.01 | 3.43 |
| 412 | U1334B | 25.86 | 26 | 0.94 | 27.79 | 2.44 | 1.00 | 2.29 |
| 413 | U1334B | 25.86 | 19 | 0.70 | 27.22 | 2.44 | 0.99 | 1.69 |
| 414 | U1334B | 25.86 | 26 | 0.92 | 28.23 | 2.44 | 0.99 | 2.23 |
| 415 | U1334B | 25.86 | 32 | 1.43 | 22.36 | 2.44 | 0.97 | 3.41 |
| 416 | U1334B | 25.86 | 27 | 1.14 | 23.75 | 2.44 | 0.96 | 2.67 |
| 417 | U1334B | 25.86 | 38 | 1.39 | 27.38 | 2.44 | 1.00 | 3.39 |
| 418 | U1334B | 25.86 | 63 | 2.66 | 23.66 | 2.44 | 0.99 | 6.46 |
| 419 | U1334B | 25.86 | 28 | 1.21 | 23.16 | 2.44 | 0.97 | 2.86 |
| 420 | U1334B | 25.86 | 27 | 1.26 | 21.48 | 2.44 | 1.03 | 3.15 |
| 421 | U1334B | 25.86 | 41 | 1.97 | 20.76 | 2.44 | 1.00 | 4.80 |

|     |        |       |    |      |       |      |      |      |
|-----|--------|-------|----|------|-------|------|------|------|
| 422 | U1334B | 25.86 | 22 | 1.22 | 17.98 | 2.44 | 0.97 | 2.90 |
| 423 | U1334B | 25.86 | 22 | 1.05 | 20.87 | 2.44 | 0.94 | 2.43 |
| 424 | U1334B | 25.86 | 19 | 0.88 | 21.62 | 2.44 | 0.91 | 1.96 |
| 425 | U1334B | 25.86 | 20 | 0.94 | 21.24 | 2.44 | 0.91 | 2.08 |
| 426 | U1334B | 25.86 | 14 | 0.69 | 20.31 | 2.44 | 0.91 | 1.53 |
| 427 | U1334B | 25.86 | 40 | 2.22 | 18.02 | 2.44 | 0.93 | 5.04 |
| 428 | U1334B | 25.86 | 6  | 0.28 | 21.15 | 2.44 | 0.93 | 0.65 |
| 429 | U1334B | 25.86 | 8  | 0.36 | 22.27 | 2.44 | 0.97 | 0.85 |
| 430 | U1334B | 25.86 | 23 | 1.02 | 22.57 | 2.44 | 0.98 | 2.43 |
| 431 | U1334B | 25.86 | 11 | 0.50 | 21.97 | 2.44 | 1.00 | 1.22 |
| 432 | U1334B | 25.86 | 12 | 0.57 | 21.07 | 2.44 | 0.99 | 1.38 |
| 433 | U1334B | 25.86 | 17 | 0.74 | 23    | 2.44 | 0.96 | 1.74 |
| 434 | U1334B | 25.86 | 19 | 0.89 | 21.33 | 2.44 | 0.97 | 2.11 |
| 435 | U1334B | 25.86 | 12 | 0.57 | 21.05 | 2.44 | 0.95 | 1.32 |
| 436 | U1334B | 25.86 | 12 | 0.51 | 23.76 | 2.44 | 0.97 | 1.20 |
| 437 | U1334B | 25.86 | 20 | 0.90 | 22.15 | 2.44 | 0.96 | 2.11 |
| 438 | U1334B | 25.86 | 12 | 0.48 | 24.86 | 2.44 | 0.97 | 1.14 |
| 439 | U1334B | 25.86 | 20 | 0.75 | 26.7  | 2.44 | 1.01 | 1.84 |
| 440 | U1334B | 25.86 | 7  | 0.27 | 25.55 | 2.44 | 1.03 | 0.69 |
| 441 | U1334B | 25.86 | 10 | 0.36 | 28.06 | 2.44 | 1.02 | 0.89 |
| 442 | U1334B | 25.86 | 12 | 0.42 | 28.68 | 2.44 | 1.04 | 1.06 |
| 443 | U1334B | 25.86 | 8  | 0.34 | 23.44 | 2.44 | 1.04 | 0.87 |
| 444 | U1334B | 25.86 | 20 | 0.86 | 23.28 | 2.44 | 1.07 | 2.25 |
| 445 | U1334B | 25.86 | 12 | 0.53 | 22.65 | 2.44 | 1.08 | 1.40 |
| 446 | U1334B | 25.86 | 20 | 0.81 | 24.65 | 2.44 | 1.07 | 2.11 |
| 447 | U1334B | 25.86 | 8  | 0.35 | 23.12 | 2.44 | 1.09 | 0.92 |
| 448 | U1334B | 25.86 | 36 | 1.61 | 22.42 | 2.44 | 1.08 | 4.23 |
| 449 | U1334B | 25.86 | 30 | 1.06 | 28.33 | 2.44 | 1.05 | 2.71 |
| 450 | U1334B | 25.86 | 11 | 0.50 | 22.15 | 2.44 | 1.05 | 1.28 |
| 451 | U1334B | 25.86 | 21 | 0.89 | 23.63 | 2.44 | 1.07 | 2.32 |
| 452 | U1334B | 25.86 | 14 | 0.69 | 20.25 | 2.44 | 1.05 | 1.77 |
| 453 | U1334B | 25.86 | 13 | 0.64 | 20.4  | 2.44 | 1.06 | 1.65 |
| 454 | U1334B | 25.86 | 8  | 0.52 | 15.26 | 1.60 | 1.08 | 0.90 |
| 455 | U1334B | 25.86 | 10 | 0.44 | 22.92 | 1.60 | 1.10 | 0.76 |
| 456 | U1334B | 25.86 | 8  | 0.34 | 23.39 | 1.60 | 1.08 | 0.59 |
| 457 | U1334B | 25.86 | 18 | 0.74 | 24.45 | 1.60 | 1.00 | 1.17 |
| 458 | U1334B | 25.86 | 23 | 0.94 | 24.51 | 1.60 | 1.06 | 1.59 |
| 459 | U1334B | 25.86 | 9  | 0.35 | 25.8  | 1.60 | 1.06 | 0.59 |
| 460 | U1334B | 25.86 | 26 | 0.95 | 27.25 | 1.60 | 1.07 | 1.63 |
| 461 | U1334B | 25.86 | 11 | 0.43 | 25.73 | 1.60 | 1.04 | 0.71 |
| 462 | U1334B | 25.86 | 9  | 0.35 | 25.64 | 1.60 | 1.04 | 0.58 |
| 463 | U1334B | 25.86 | 13 | 0.50 | 26.07 | 1.60 | 1.04 | 0.83 |
| 464 | U1334B | 25.86 | 36 | 1.35 | 26.69 | 1.60 | 1.02 | 2.19 |
| 465 | U1334B | 25.86 | 13 | 0.55 | 23.82 | 1.60 | 1.02 | 0.89 |
| 466 | U1334B | 25.86 | 19 | 0.78 | 24.3  | 1.60 | 1.03 | 1.28 |
| 467 | U1334B | 25.86 | 18 | 0.79 | 22.79 | 1.60 | 1.00 | 1.27 |
| 468 | U1334B | 25.86 | 7  | 0.30 | 23.42 | 1.60 | 1.01 | 0.48 |

|     |        |       |    |      |       |      |      |      |
|-----|--------|-------|----|------|-------|------|------|------|
| 469 | U1334B | 25.86 | 8  | 0.30 | 26.63 | 1.60 | 1.04 | 0.50 |
| 470 | U1334C | 25.86 | 11 | 0.40 | 27.68 | 1.60 | 1.00 | 0.63 |
| 471 | U1334C | 25.86 | 10 | 0.31 | 32.57 | 1.60 | 1.05 | 0.51 |
| 472 | U1334C | 25.86 | 28 | 0.89 | 31.42 | 1.60 | 1.06 | 1.50 |
| 473 | U1334C | 25.86 | 8  | 0.27 | 29.68 | 1.60 | 1.05 | 0.45 |
| 474 | U1334C | 25.86 | 18 | 0.54 | 33.04 | 1.60 | 1.03 | 0.90 |
| 475 | U1334C | 25.86 | 25 | 0.63 | 39.54 | 1.60 | 1.02 | 1.03 |
| 476 | U1334C | 25.86 | 36 | 1.00 | 36.17 | 1.60 | 0.98 | 1.57 |
| 477 | U1334C | 25.86 | 30 | 1.01 | 29.75 | 1.60 | 0.95 | 1.53 |
| 478 | U1334C | 25.86 | 28 | 1.00 | 27.99 | 1.60 | 0.93 | 1.49 |
| 479 | U1334C | 25.86 | 21 | 0.52 | 40.42 | 1.60 | 0.99 | 0.82 |
| 480 | U1334C | 25.86 | 28 | 0.94 | 29.9  | 1.60 | 0.96 | 1.43 |
| 481 | U1334C | 25.86 | 40 | 1.33 | 30    | 1.60 | 0.96 | 2.05 |
| 482 | U1334C | 25.86 | 36 | 1.28 | 28.03 | 1.60 | 0.96 | 1.97 |
| 483 | U1334C | 25.86 | 24 | 0.86 | 27.93 | 1.60 | 0.91 | 1.25 |
| 484 | U1334C | 25.86 | 24 | 0.98 | 24.57 | 1.60 | 1.01 | 1.58 |
| 485 | U1334C | 25.86 | 42 | 1.60 | 26.23 | 1.60 | 1.00 | 2.55 |
| 486 | U1334C | 25.86 | 24 | 1.08 | 22.13 | 1.60 | 0.99 | 1.71 |
| 487 | U1334C | 25.86 | 27 | 1.12 | 24.09 | 1.60 | 0.96 | 1.72 |
| 488 | U1334C | 25.86 | 12 | 0.61 | 19.55 | 1.60 | 0.97 | 0.96 |
| 489 | U1334C | 25.86 | 21 | 0.91 | 22.96 | 1.60 | 0.99 | 1.45 |
| 490 | U1334C | 25.86 | 36 | 1.75 | 20.56 | 2.10 | 0.99 | 3.65 |
| 491 | U1334C | 25.86 | 18 | 0.98 | 18.4  | 2.10 | 1.01 | 2.06 |
| 492 | U1334C | 25.86 | 43 | 1.46 | 29.42 | 2.10 | 1.02 | 3.11 |
| 493 | U1334C | 25.86 | 33 | 1.31 | 25.26 | 2.10 | 1.01 | 2.76 |
| 494 | U1334C | 25.86 | 38 | 1.21 | 31.44 | 2.10 | 0.97 | 2.45 |
| 495 | U1334C | 25.86 | 25 | 0.90 | 27.81 | 2.10 | 0.96 | 1.82 |
| 496 | U1334C | 25.86 | 38 | 1.34 | 28.27 | 2.10 | 0.93 | 2.62 |
| 497 | U1334C | 25.86 | 29 | 1.02 | 28.52 | 2.10 | 0.94 | 2.00 |
| 498 | U1334C | 25.86 | 16 | 0.60 | 26.7  | 2.10 | 0.94 | 1.18 |
| 499 | U1334C | 25.86 | 19 | 0.92 | 20.74 | 2.10 | 0.91 | 1.75 |
| 500 | U1334C | 25.86 | 18 | 0.86 | 20.91 | 2.10 | 0.95 | 1.71 |
| 501 | U1334C | 25.86 | 16 | 1.00 | 16.07 | 2.10 | 0.94 | 1.95 |
| 502 | U1334C | 25.86 | 17 | 1.17 | 14.54 | 2.10 | 0.89 | 2.19 |
| 503 | U1334C | 25.86 | 17 | 0.74 | 23    | 2.10 | 0.89 | 1.38 |
| 504 | U1334C | 25.86 | 11 | 0.48 | 22.73 | 2.10 | 0.89 | 0.90 |
| 505 | U1334C | 25.86 | 8  | 0.28 | 28.7  | 2.10 | 0.88 | 0.51 |
| 506 | U1334C | 25.86 | 29 | 1.31 | 22.16 | 2.10 | 0.89 | 2.43 |
| 507 | U1334C | 25.86 | 8  | 0.32 | 24.88 | 2.10 | 0.89 | 0.60 |
| 508 | U1334C | 25.86 | 12 | 0.46 | 26.01 | 2.10 | 0.91 | 0.88 |
| 509 | U1334C | 25.86 | 16 | 0.52 | 30.57 | 2.10 | 0.91 | 1.00 |
| 510 | U1334C | 25.86 | 30 | 1.17 | 25.54 | 2.10 | 0.90 | 2.22 |
| 511 | U1334C | 25.86 | 14 | 0.56 | 25.15 | 2.10 | 0.91 | 1.06 |
| 512 | U1334C | 25.86 | 8  | 0.30 | 26.81 | 2.10 | 0.89 | 0.56 |
| 513 | U1334C | 25.86 | 16 | 0.76 | 20.94 | 2.10 | 0.95 | 1.52 |
| 514 | U1334C | 25.86 | 17 | 0.69 | 24.73 | 2.10 | 0.94 | 1.36 |
| 515 | U1334C | 25.86 | 19 | 0.88 | 21.52 | 2.10 | 0.96 | 1.78 |

|     |        |       |    |      |       |      |      |      |
|-----|--------|-------|----|------|-------|------|------|------|
| 516 | U1334C | 25.86 | 13 | 0.61 | 21.32 | 2.10 | 0.92 | 1.18 |
| 517 | U1334C | 25.86 | 36 | 1.73 | 20.82 | 2.10 | 0.90 | 3.27 |
| 518 | U1334C | 25.86 | 16 | 0.74 | 21.73 | 2.10 | 0.93 | 1.43 |
| 519 | U1334C | 25.86 | 15 | 0.65 | 22.99 | 2.10 | 0.91 | 1.24 |
| 520 | U1334C | 25.86 | 14 | 0.71 | 19.59 | 2.10 | 0.90 | 1.35 |
| 521 | U1334C | 25.86 | 11 | 0.52 | 21.02 | 2.10 | 0.87 | 0.96 |
| 522 | U1334C | 25.86 | 10 | 0.39 | 25.58 | 2.10 | 0.90 | 0.73 |
| 523 | U1334C | 25.86 | 20 | 0.81 | 24.55 | 2.10 | 0.95 | 1.62 |
| 524 | U1334C | 25.86 | 13 | 0.46 | 28.28 | 2.10 | 0.94 | 0.91 |
| 525 | U1334C | 25.86 | 7  | 0.30 | 23.6  | 2.10 | 0.94 | 0.59 |
| 526 | U1334C | 25.86 | 7  | 0.32 | 22.16 | 2.10 | 0.99 | 0.66 |
| 527 | U1334C | 25.86 | 15 | 0.50 | 30    | 2.10 | 0.97 | 1.01 |
| 528 | U1334C | 25.86 | 15 | 0.48 | 31.5  | 2.10 | 0.98 | 0.98 |
| 529 | U1334C | 25.86 | 19 | 0.73 | 25.99 | 2.10 | 0.99 | 1.51 |
| 530 | U1334C | 25.86 | 28 | 1.02 | 27.45 | 2.10 | 1.01 | 2.16 |
| 531 | U1334C | 25.86 | 9  | 0.35 | 25.88 | 2.10 | 1.01 | 0.74 |
| 532 | U1334C | 25.86 | 28 | 1.13 | 24.88 | 2.35 | 1.03 | 2.71 |
| 533 | U1334C | 25.86 | 16 | 0.68 | 23.44 | 2.35 | 1.02 | 1.64 |
| 534 | U1334C | 25.86 | 16 | 0.59 | 26.9  | 2.35 | 1.00 | 1.40 |
| 535 | U1334C | 25.86 | 13 | 0.55 | 23.7  | 2.35 | 0.99 | 1.27 |
| 536 | U1334C | 25.86 | 23 | 0.91 | 25.17 | 2.35 | 0.95 | 2.05 |
| 537 | U1334C | 25.86 | 16 | 0.71 | 22.67 | 2.35 | 0.90 | 1.49 |
| 538 | U1334C | 25.86 | 21 | 0.56 | 37.26 | 2.35 | 0.89 | 1.18 |
| 539 | U1334C | 25.86 | 14 | 0.52 | 26.81 | 2.35 | 0.94 | 1.16 |
| 540 | U1334C | 25.86 | 26 | 1.02 | 25.5  | 2.35 | 0.98 | 2.35 |
| 541 | U1334C | 25.86 | 18 | 0.90 | 20.11 | 2.35 | 1.01 | 2.13 |
| 542 | U1334C | 25.86 | 9  | 0.55 | 16.29 | 2.35 | 1.01 | 1.31 |
| 543 | U1334C | 25.86 | 15 | 0.62 | 24.1  | 2.35 | 1.04 | 1.52 |
| 544 | U1334C | 25.86 | 13 | 0.50 | 25.9  | 2.35 | 1.03 | 1.22 |
| 545 | U1334C | 25.86 | 25 | 1.01 | 24.64 | 2.35 | 1.04 | 2.48 |
| 546 | U1334C | 25.86 | 35 | 1.49 | 23.47 | 2.35 | 1.05 | 3.68 |
| 547 | U1334C | 25.86 | 36 | 1.60 | 22.45 | 2.35 | 1.02 | 3.85 |
| 548 | U1334C | 25.86 | 47 | 2.38 | 19.74 | 2.35 | 1.02 | 5.69 |
| 549 | U1334C | 25.86 | 13 | 0.53 | 24.55 | 2.35 | 0.98 | 1.21 |
| 550 | U1334C | 25.86 | 10 | 0.48 | 20.98 | 2.35 | 0.94 | 1.05 |
| 551 | U1334C | 25.86 | 10 | 0.37 | 26.83 | 2.35 | 0.94 | 0.82 |
| 552 | U1334C | 25.86 | 17 | 0.66 | 25.66 | 2.35 | 0.96 | 1.50 |
| 553 | U1334C | 25.86 | 17 | 0.71 | 24.05 | 2.35 | 0.98 | 1.63 |
| 554 | U1334C | 25.86 | 15 | 0.56 | 26.92 | 2.35 | 0.98 | 1.29 |
| 555 | U1334C | 25.86 | 17 | 0.57 | 29.58 | 2.35 | 0.94 | 1.28 |
| 556 | U1334C | 25.86 | 27 | 0.82 | 32.87 | 2.35 | 0.98 | 1.89 |
| 557 | U1334C | 25.86 | 11 | 0.37 | 29.63 | 2.35 | 0.99 | 0.87 |
| 558 | U1334C | 25.86 | 27 | 0.85 | 31.86 | 2.35 | 0.95 | 1.90 |
| 559 | U1334C | 25.86 | 14 | 0.47 | 30.05 | 2.35 | 0.96 | 1.05 |
| 560 | U1334C | 25.86 | 22 | 0.73 | 30.07 | 2.35 | 0.96 | 1.66 |
| 561 | U1334C | 25.86 | 29 | 1.01 | 28.58 | 2.35 | 0.94 | 2.23 |
| 562 | U1334C | 25.86 | 52 | 1.68 | 30.94 | 2.35 | 0.92 | 3.66 |

|     |        |       |     |      |       |      |      |      |
|-----|--------|-------|-----|------|-------|------|------|------|
| 563 | U1334C | 25.86 | 26  | 0.92 | 28.29 | 2.35 | 0.92 | 1.98 |
| 564 | U1334C | 25.86 | 23  | 0.79 | 29.13 | 2.35 | 0.93 | 1.72 |
| 565 | U1334C | 25.86 | 29  | 0.99 | 29.19 | 2.35 | 0.97 | 2.27 |
| 566 | U1334C | 25.86 | 118 | 3.20 | 36.91 | 2.35 | 0.96 | 7.25 |
| 567 | U1334C | 25.86 | 19  | 0.59 | 32.11 | 2.35 | 0.94 | 1.31 |
| 568 | U1334C | 25.86 | 66  | 2.40 | 27.53 | 2.35 | 0.98 | 5.54 |
| 569 | U1334C | 25.86 | 41  | 1.44 | 28.4  | 2.35 | 1.02 | 3.48 |
| 570 | U1334C | 25.86 | 47  | 1.67 | 28.13 | 2.35 | 1.01 | 3.97 |
| 571 | U1334C | 25.86 | 32  | 1.27 | 25.22 | 1.75 | 1.02 | 2.25 |
| 572 | U1334C | 25.86 | 22  | 1.06 | 20.76 | 1.04 | 1.04 | 1.15 |
| 573 | U1334C | 25.86 | 19  | 0.95 | 19.97 | 1.04 | 1.02 | 1.02 |
| 574 | U1334C | 25.86 | 24  | 1.00 | 24.12 | 1.04 | 1.01 | 1.05 |
| 575 | U1334C | 25.86 | 24  | 0.85 | 28.27 | 1.04 | 1.01 | 0.89 |
| 576 | U1334C | 25.86 | 35  | 1.12 | 31.13 | 1.04 | 0.98 | 1.15 |
| 577 | U1334C | 25.86 | 13  | 0.46 | 28.47 | 1.04 | 0.98 | 0.47 |
| 578 | U1334C | 25.86 | 15  | 0.67 | 22.23 | 1.04 | 1.00 | 0.71 |
| 579 | U1334C | 25.86 | 21  | 0.87 | 24.07 | 1.04 | 1.01 | 0.92 |
| 580 | U1334C | 25.86 | 20  | 0.89 | 22.42 | 1.04 | 1.02 | 0.95 |
| 581 | U1334C | 25.86 | 18  | 0.67 | 26.97 | 1.04 | 1.02 | 0.71 |
| 582 | U1334C | 25.86 | 32  | 1.13 | 28.2  | 1.04 | 1.00 | 1.18 |
| 583 | U1334C | 25.86 | 24  | 1.08 | 22.29 | 1.04 | 0.99 | 1.12 |
| 584 | U1334C | 25.86 | 42  | 1.46 | 28.77 | 1.04 | 1.03 | 1.56 |
| 585 | U1334C | 25.86 | 38  | 1.47 | 25.84 | 1.04 | 0.95 | 1.46 |
| 586 | U1334C | 25.86 | 62  | 2.38 | 26.04 | 1.04 | 0.98 | 2.43 |
| 587 | U1334C | 25.86 | 39  | 1.33 | 29.28 | 1.04 | 0.98 | 1.36 |
| 588 | U1334C | 25.86 | 25  | 0.86 | 29.15 | 1.04 | 1.00 | 0.90 |
| 589 | U1334C | 25.86 | 28  | 1.10 | 25.44 | 1.04 | 0.98 | 1.13 |
| 590 | U1334B | 25.86 | 39  | 1.57 | 24.83 | 1.04 | 1.01 | 1.65 |
| 591 | U1334B | 25.86 | 23  | 0.81 | 28.28 | 0.82 | 1.03 | 0.68 |
| 592 | U1334B | 25.86 | 20  | 0.82 | 24.36 | 0.82 | 1.02 | 0.68 |
| 593 | U1334B | 25.86 | 25  | 0.93 | 26.86 | 0.82 | 0.97 | 0.74 |
| 594 | U1334B | 25.86 | 13  | 0.49 | 26.76 | 0.82 | 0.96 | 0.38 |
| 595 | U1334B | 25.86 | 10  | 0.41 | 24.68 | 0.82 | 0.96 | 0.32 |
| 596 | U1334B | 25.86 | 13  | 0.58 | 22.31 | 0.82 | 0.96 | 0.46 |
| 597 | U1334B | 25.86 | 16  | 0.67 | 23.73 | 0.82 | 0.98 | 0.54 |
| 598 | U1334B | 25.86 | 10  | 0.42 | 23.67 | 0.82 | 0.95 | 0.33 |
| 599 | U1334B | 25.86 | 11  | 0.40 | 27.62 | 0.82 | 0.93 | 0.30 |
| 600 | U1334B | 25.86 | 18  | 0.81 | 22.29 | 0.82 | 0.94 | 0.62 |
| 601 | U1334B | 25.86 | 15  | 0.63 | 23.63 | 0.82 | 0.93 | 0.48 |
| 602 | U1334B | 25.86 | 23  | 0.96 | 23.99 | 0.82 | 0.90 | 0.70 |
| 603 | U1334B | 25.86 | 36  | 1.55 | 23.16 | 0.82 | 0.96 | 1.22 |
| 604 | U1334B | 25.86 | 17  | 0.70 | 24.15 | 0.82 | 0.94 | 0.54 |
| 605 | U1334B | 25.86 | 26  | 1.02 | 25.46 | 0.82 | 0.95 | 0.79 |
| 606 | U1334B | 25.86 | 23  | 0.79 | 29.17 | 0.82 | 0.98 | 0.63 |
| 607 | U1334B | 25.86 | 25  | 0.90 | 27.8  | 0.82 | 0.99 | 0.73 |
| 608 | U1334B | 25.86 | 24  | 0.88 | 27.29 | 1.86 | 1.00 | 1.63 |
| 609 | U1334B | 25.86 | 28  | 1.05 | 26.78 | 1.86 | 1.03 | 1.99 |

|     |        |       |    |      |       |      |      |      |
|-----|--------|-------|----|------|-------|------|------|------|
| 610 | U1334B | 25.86 | 68 | 2.34 | 29.07 | 1.86 | 1.01 | 4.40 |
| 611 | U1334B | 25.86 | 20 | 0.84 | 23.91 | 1.86 | 1.01 | 1.57 |
| 612 | U1334B | 25.86 | 20 | 0.76 | 26.22 | 1.86 | 1.01 | 1.43 |
| 613 | U1334B | 25.86 | 17 | 0.57 | 29.86 | 1.86 | 1.02 | 1.07 |
| 614 | U1334B | 25.86 | 11 | 0.41 | 27.13 | 1.86 | 1.02 | 0.77 |
| 615 | U1334B | 25.86 | 29 | 1.08 | 26.73 | 1.86 | 1.00 | 2.01 |
| 616 | U1334B | 25.86 | 13 | 0.57 | 22.86 | 1.86 | 1.00 | 1.05 |
| 617 | U1334B | 25.86 | 14 | 0.48 | 29.22 | 1.86 | 1.03 | 0.92 |
| 618 | U1334B | 25.86 | 16 | 0.68 | 23.48 | 1.86 | 1.02 | 1.29 |
| 619 | U1334B | 25.86 | 26 | 0.93 | 28    | 1.86 | 0.99 | 1.71 |
| 620 | U1334B | 25.86 | 12 | 0.51 | 23.57 | 1.86 | 0.99 | 0.94 |
| 621 | U1334B | 25.86 | 23 | 0.89 | 25.92 | 1.86 | 0.98 | 1.62 |
| 622 | U1334B | 25.86 | 25 | 0.96 | 26.1  | 1.86 | 0.98 | 1.74 |
| 623 | U1334B | 25.86 | 23 | 0.77 | 29.74 | 1.86 | 1.01 | 1.46 |
| 624 | U1334B | 25.86 | 18 | 0.80 | 22.64 | 1.86 | 0.99 | 1.46 |
| 625 | U1334B | 25.86 | 34 | 1.53 | 22.16 | 1.86 | 0.99 | 2.83 |
| 626 | U1334B | 25.86 | 10 | 0.47 | 21.35 | 1.86 | 0.93 | 0.81 |
| 627 | U1334B | 25.86 | 17 | 0.90 | 18.95 | 1.86 | 0.91 | 1.52 |
| 628 | U1334B | 25.86 | 20 | 0.96 | 20.73 | 1.86 | 0.91 | 1.62 |
| 629 | U1334B | 25.86 | 16 | 0.68 | 23.37 | 1.86 | 0.98 | 1.25 |
| 630 | U1334B | 25.86 | 17 | 0.67 | 25.48 | 1.86 | 1.03 | 1.27 |
| 631 | U1334B | 25.86 | 12 | 0.52 | 23.03 | 1.86 | 1.01 | 0.98 |
| 632 | U1334B | 25.86 | 13 | 0.50 | 26.21 | 1.86 | 1.03 | 0.95 |
| 633 | U1334B | 25.86 | 20 | 0.79 | 25.35 | 1.86 | 1.02 | 1.50 |
| 634 | U1334B | 25.86 | 29 | 1.16 | 24.98 | 1.86 | 1.01 | 2.19 |
| 635 | U1334B | 25.86 | 32 | 1.24 | 25.8  | 1.86 | 1.01 | 2.32 |
| 636 | U1334B | 25.86 | 27 | 1.18 | 22.91 | 1.86 | 1.06 | 2.32 |
| 637 | U1334B | 25.86 | 31 | 1.29 | 24.06 | 1.86 | 0.99 | 2.37 |
| 638 | U1334B | 25.86 | 29 | 1.28 | 22.59 | 1.86 | 1.03 | 2.45 |
| 639 | U1334B | 25.86 | 76 | 3.09 | 24.63 | 1.86 | 1.02 | 5.87 |
| 640 | U1334B | 25.86 | 31 | 1.28 | 24.28 | 1.86 | 1.05 | 2.50 |
| 641 | U1334B | 25.86 | 18 | 0.98 | 18.42 | 1.86 | 1.01 | 1.83 |
| 642 | U1334B | 25.86 | 15 | 0.56 | 26.6  | 1.86 | 1.03 | 1.08 |
| 643 | U1334B | 25.86 | 29 | 1.31 | 22.22 | 1.86 | 1.05 | 2.55 |
| 644 | U1334B | 25.86 | 21 | 1.06 | 19.76 | 1.86 | 1.05 | 2.07 |
| 645 | U1334B | 25.86 | 13 | 0.56 | 23.41 | 1.86 | 1.05 | 1.09 |
| 646 | U1334B | 25.86 | 18 | 0.97 | 18.63 | 1.86 | 1.12 | 2.01 |
| 647 | U1334B | 25.86 | 14 | 0.61 | 23.06 | 2.53 | 1.08 | 1.66 |
| 648 | U1334B | 25.86 | 42 | 1.94 | 21.69 | 2.53 | 1.11 | 5.44 |
| 649 | U1334B | 25.86 | 39 | 1.60 | 24.4  | 2.53 | 1.07 | 4.34 |
| 650 | U1334B | 25.86 | 21 | 1.02 | 20.6  | 2.53 | 1.08 | 2.78 |
| 651 | U1334B | 25.86 | 18 | 0.80 | 22.53 | 2.53 | 1.10 | 2.23 |
| 652 | U1334B | 25.86 | 15 | 0.69 | 21.71 | 2.53 | 1.10 | 1.91 |
| 653 | U1334B | 25.86 | 16 | 0.64 | 24.93 | 2.53 | 1.11 | 1.80 |
| 654 | U1334B | 25.86 | 27 | 1.03 | 26.14 | 2.53 | 1.10 | 2.88 |
| 655 | U1334B | 25.86 | 18 | 0.76 | 23.55 | 2.53 | 1.06 | 2.05 |
| 656 | U1334B | 25.86 | 25 | 0.99 | 25.14 | 2.53 | 1.07 | 2.69 |

|     |        |       |    |      |       |      |      |      |
|-----|--------|-------|----|------|-------|------|------|------|
| 657 | U1334B | 25.86 | 20 | 0.84 | 23.87 | 2.53 | 1.08 | 2.28 |
| 658 | U1334B | 25.86 | 19 | 0.79 | 24.11 | 2.53 | 1.08 | 2.15 |
| 659 | U1334B | 25.86 | 32 | 1.31 | 24.44 | 2.53 | 1.03 | 3.39 |
| 660 | U1334B | 25.86 | 28 | 1.25 | 22.48 | 2.53 | 0.99 | 3.13 |
| 661 | U1334B | 25.86 | 33 | 1.38 | 23.87 | 2.53 | 1.02 | 3.57 |
| 662 | U1334B | 25.86 | 12 | 0.55 | 21.99 | 2.53 | 1.00 | 1.37 |
| 663 | U1334B | 25.86 | 9  | 0.40 | 22.3  | 2.53 | 1.01 | 1.03 |
| 664 | U1334B | 25.86 | 15 | 0.65 | 22.95 | 2.53 | 0.98 | 1.62 |
| 665 | U1334B | 25.86 | 25 | 0.92 | 27.05 | 2.53 | 1.02 | 2.39 |
| 666 | U1334B | 25.86 | 20 | 0.74 | 26.93 | 2.53 | 1.04 | 1.95 |
| 667 | U1334B | 25.86 | 15 | 0.60 | 25.04 | 2.53 | 1.05 | 1.59 |
| 668 | U1334B | 25.86 | 13 | 0.47 | 27.5  | 2.53 | 1.06 | 1.26 |
| 669 | U1334B | 25.86 | 24 | 0.86 | 27.91 | 2.53 | 1.01 | 2.20 |
| 670 | U1334B | 25.86 | 12 | 0.55 | 21.85 | 2.53 | 1.00 | 1.39 |
| 671 | U1334B | 25.86 | 11 | 0.44 | 25.15 | 2.53 | 0.97 | 1.07 |
| 672 | U1334B | 25.86 | 11 | 0.54 | 20.28 | 2.53 | 0.96 | 1.32 |
| 673 | U1334B | 25.86 | 27 | 1.39 | 19.46 | 2.53 | 0.94 | 3.31 |
| 674 | U1334B | 25.86 | 17 | 0.69 | 24.64 | 2.53 | 0.99 | 1.72 |
| 675 | U1334B | 25.86 | 32 | 1.34 | 23.96 | 2.53 | 0.99 | 3.34 |
| 676 | U1334B | 25.86 | 32 | 1.24 | 25.77 | 2.53 | 0.99 | 3.10 |
| 677 | U1334B | 25.86 | 36 | 1.41 | 25.58 | 2.53 | 1.03 | 3.67 |
| 678 | U1334B | 25.86 | 39 | 1.50 | 26    | 2.53 | 1.09 | 4.13 |
| 679 | U1334B | 25.86 | 15 | 0.57 | 26.17 | 2.53 | 1.10 | 1.59 |
| 680 | U1334B | 25.86 | 22 | 0.87 | 25.34 | 2.53 | 1.13 | 2.47 |
| 681 | U1334B | 25.86 | 39 | 1.62 | 24.06 | 2.53 | 1.12 | 4.58 |
| 682 | U1334B | 25.86 | 35 | 1.42 | 24.73 | 2.53 | 1.07 | 3.84 |
| 683 | U1334B | 25.86 | 20 | 0.97 | 20.58 | 2.53 | 1.02 | 2.52 |
| 684 | U1334B | 25.86 | 36 | 1.55 | 23.28 | 2.53 | 1.06 | 4.13 |
| 685 | U1334B | 25.86 | 26 | 1.45 | 17.94 | 2.53 | 1.05 | 3.85 |
| 686 | U1334B | 25.86 | 24 | 1.12 | 21.36 | 2.53 | 1.06 | 3.02 |
| 687 | U1334B | 25.86 | 12 | 0.61 | 19.53 | 2.53 | 1.06 | 1.64 |
| 688 | U1334B | 25.86 | 11 | 0.52 | 21.22 | 2.53 | 1.07 | 1.40 |
| 689 | U1334B | 25.86 | 19 | 0.95 | 19.9  | 2.53 | 1.07 | 2.58 |
| 690 | U1334B | 25.86 | 23 | 0.95 | 24.28 | 2.53 | 1.10 | 2.62 |
| 691 | U1334B | 25.86 | 17 | 0.59 | 29.05 | 2.53 | 1.09 | 1.62 |
| 692 | U1334B | 25.86 | 16 | 0.60 | 26.54 | 2.53 | 1.07 | 1.62 |
| 693 | U1334B | 25.86 | 19 | 0.71 | 26.68 | 2.53 | 1.07 | 1.92 |
| 694 | U1334B | 25.86 | 36 | 1.28 | 28.22 | 2.53 | 1.07 | 3.45 |
| 695 | U1334B | 25.86 | 54 | 2.00 | 26.94 | 2.53 | 1.11 | 5.61 |
| 696 | U1334B | 25.86 | 15 | 0.56 | 26.88 | 2.53 | 1.10 | 1.55 |
| 697 | U1334B | 25.86 | 36 | 1.42 | 25.37 | 2.53 | 1.08 | 3.86 |
| 698 | U1334B | 25.86 | 26 | 1.09 | 23.82 | 2.53 | 1.10 | 3.04 |
| 699 | U1334B | 25.86 | 24 | 0.99 | 24.31 | 2.53 | 1.10 | 2.75 |
| 700 | U1334B | 25.86 | 25 | 1.00 | 24.89 | 2.53 | 1.06 | 2.70 |
| 701 | U1334B | 25.86 | 21 | 0.82 | 25.68 | 2.53 | 1.08 | 2.24 |
| 702 | U1334B | 25.86 | 30 | 1.11 | 27.04 | 2.53 | 1.09 | 3.06 |
| 703 | U1334B | 25.86 | 28 | 1.18 | 23.74 | 2.53 | 1.13 | 3.37 |

|     |        |       |    |      |       |      |      |       |
|-----|--------|-------|----|------|-------|------|------|-------|
| 704 | U1334B | 25.86 | 14 | 0.51 | 27.47 | 2.53 | 1.12 | 1.44  |
| 705 | U1334B | 25.86 | 25 | 0.93 | 26.8  | 2.53 | 1.12 | 2.65  |
| 706 | U1334B | 25.86 | 24 | 0.85 | 28.14 | 2.53 | 1.11 | 2.39  |
| 707 | U1334B | 25.86 | 21 | 0.78 | 26.81 | 2.53 | 1.09 | 2.15  |
| 708 | U1334B | 25.86 | 24 | 1.16 | 20.77 | 2.53 | 1.09 | 3.17  |
| 709 | U1334B | 25.86 | 23 | 1.13 | 20.36 | 2.53 | 1.09 | 3.12  |
| 710 | U1334B | 25.86 | 17 | 0.75 | 22.7  | 2.53 | 1.09 | 2.06  |
| 711 | U1334B | 25.86 | 28 | 1.23 | 22.77 | 2.53 | 1.08 | 3.36  |
| 712 | U1334B | 25.86 | 19 | 0.74 | 25.84 | 2.53 | 1.12 | 2.08  |
| 713 | U1334B | 25.86 | 36 | 1.41 | 25.58 | 2.53 | 1.13 | 4.01  |
| 714 | U1334B | 25.86 | 35 | 1.28 | 27.25 | 2.53 | 1.13 | 3.65  |
| 715 | U1334B | 25.86 | 34 | 1.31 | 26.04 | 2.53 | 1.14 | 3.75  |
| 716 | U1334B | 25.86 | 93 | 4.37 | 21.28 | 2.53 | 1.13 | 12.48 |
| 717 | U1334B | 25.86 | 23 | 1.00 | 23.06 | 2.53 | 1.10 | 2.78  |
| 718 | U1334B | 25.86 | 33 | 1.45 | 22.73 | 2.53 | 1.12 | 4.10  |
| 719 | U1334B | 25.86 | 23 | 1.03 | 22.23 | 2.53 | 1.11 | 2.91  |
| 720 | U1334B | 25.86 | 23 | 0.94 | 24.57 | 2.53 | 1.12 | 2.65  |
| 721 | U1334B | 25.86 | 21 | 0.98 | 21.4  | 2.53 | 1.11 | 2.76  |
| 722 | U1334B | 25.86 | 59 | 2.28 | 25.88 | 2.53 | 1.13 | 6.50  |
| 723 | U1334B | 25.86 | 32 | 1.25 | 25.55 | 2.40 | 1.13 | 3.40  |
| 724 | U1334B | 25.86 | 48 | 1.71 | 27.99 | 2.38 | 1.10 | 4.48  |
| 725 | U1334B | 25.86 | 40 | 1.55 | 25.82 | 2.38 | 1.11 | 4.09  |
| 726 | U1334B | 25.86 | 25 | 0.90 | 27.7  | 2.38 | 1.13 | 2.41  |
| 727 | U1334B | 25.86 | 26 | 0.82 | 31.54 | 2.38 | 1.10 | 2.16  |
| 728 | U1334B | 25.86 | 38 | 1.05 | 36.11 | 2.38 | 1.10 | 2.75  |
| 729 | U1334B | 25.86 | 27 | 0.91 | 29.63 | 2.38 | 1.09 | 2.37  |
| 730 | U1334B | 25.86 | 25 | 0.83 | 30.24 | 2.38 | 1.07 | 2.10  |
| 731 | U1334B | 25.86 | 26 | 0.67 | 38.79 | 2.38 | 1.05 | 1.68  |
| 732 | U1334B | 25.86 | 25 | 0.91 | 27.61 | 2.38 | 1.03 | 2.22  |
| 733 | U1334B | 25.86 | 18 | 0.63 | 28.43 | 2.38 | 1.03 | 1.55  |
| 734 | U1334B | 25.86 | 20 | 0.72 | 27.69 | 2.38 | 1.00 | 1.72  |
| 735 | U1334B | 25.86 | 29 | 1.07 | 27.18 | 2.38 | 1.03 | 2.60  |
| 736 | U1334B | 25.86 | 21 | 0.83 | 25.3  | 2.38 | 1.01 | 2.00  |
| 737 | U1334C | 25.86 | 17 | 0.63 | 26.99 | 2.38 | 1.02 | 1.53  |
| 738 | U1334C | 25.86 | 25 | 1.20 | 20.79 | 2.38 | 0.94 | 2.69  |
| 739 | U1334C | 25.86 | 12 | 0.50 | 23.92 | 2.38 | 0.94 | 1.12  |
| 740 | U1334C | 25.86 | 19 | 0.79 | 24    | 2.38 | 0.97 | 1.82  |
| 741 | U1334C | 25.86 | 13 | 0.52 | 25.21 | 2.38 | 0.93 | 1.15  |
| 742 | U1334C | 25.86 | 17 | 0.63 | 27.12 | 2.38 | 0.97 | 1.45  |
| 743 | U1334C | 25.86 | 23 | 0.84 | 27.32 | 2.38 | 0.98 | 1.97  |
| 744 | U1334C | 25.86 | 27 | 1.05 | 25.75 | 2.38 | 1.01 | 2.53  |
| 745 | U1334C | 25.86 | 33 | 1.19 | 27.65 | 2.38 | 1.00 | 2.85  |
| 746 | U1334C | 25.86 | 29 | 1.10 | 26.29 | 2.38 | 1.02 | 2.66  |
| 747 | U1334C | 25.86 | 20 | 0.67 | 29.82 | 2.38 | 0.99 | 1.58  |
| 748 | U1334C | 25.86 | 20 | 0.80 | 25.02 | 2.38 | 0.94 | 1.79  |
| 749 | U1334C | 25.86 | 16 | 0.61 | 26.35 | 2.38 | 0.91 | 1.32  |
| 750 | U1334C | 25.86 | 23 | 0.84 | 27.48 | 2.38 | 0.95 | 1.89  |



|     |        |       |    |      |       |      |      |      |
|-----|--------|-------|----|------|-------|------|------|------|
| 751 | U1334C | 25.86 | 14 | 0.65 | 21.41 | 2.38 | 0.94 | 1.45 |
| 752 | U1334C | 25.86 | 16 | 0.70 | 22.85 | 2.38 | 0.94 | 1.57 |
| 753 | U1334C | 25.86 | 22 | 0.91 | 24.25 | 2.38 | 1.01 | 2.18 |
| 754 | U1334C | 25.86 | 22 | 0.96 | 22.91 | 2.38 | 1.02 | 2.32 |
| 755 | U1334C | 25.86 | 12 | 0.57 | 21.1  | 2.38 | 1.00 | 1.36 |
| 756 | U1334C | 25.86 | 15 | 0.67 | 22.41 | 2.38 | 1.02 | 1.63 |
| 757 | U1334C | 25.86 | 28 | 1.20 | 23.34 | 2.38 | 1.02 | 2.91 |
| 758 | U1334C | 25.86 | 23 | 1.11 | 20.68 | 2.38 | 1.03 | 2.73 |
| 759 | U1334C | 25.86 | 30 | 1.31 | 22.85 | 2.38 | 1.04 | 3.23 |
| 760 | U1334C | 25.86 | 17 | 0.70 | 24.29 | 2.38 | 1.07 | 1.78 |
| 761 | U1334C | 25.86 | 19 | 0.81 | 23.49 | 2.38 | 1.03 | 1.97 |
| 762 | U1334C | 25.86 | 17 | 0.76 | 22.35 | 2.38 | 1.04 | 1.88 |
| 763 | U1334C | 25.86 | 18 | 0.71 | 25.35 | 2.38 | 1.07 | 1.81 |
| 764 | U1334C | 25.86 | 20 | 0.86 | 23.31 | 2.38 | 1.08 | 2.21 |
| 765 | U1334C | 25.86 | 28 | 1.35 | 20.69 | 2.38 | 1.04 | 3.34 |
| 766 | U1334C | 25.86 | 33 | 1.52 | 21.76 | 2.38 | 1.03 | 3.70 |
| 767 | U1334C | 25.86 | 13 | 0.71 | 18.3  | 2.38 | 1.03 | 1.74 |
| 768 | U1334C | 25.86 | 16 | 0.76 | 20.93 | 2.38 | 1.06 | 1.92 |
| 769 | U1334C | 25.86 | 24 | 0.93 | 25.77 | 2.38 | 1.07 | 2.37 |
| 770 | U1334C | 25.86 | 20 | 0.86 | 23.26 | 2.38 | 1.11 | 2.26 |
| 771 | U1334C | 25.86 | 20 | 0.80 | 25.03 | 2.38 | 1.09 | 2.07 |
| 772 | U1334C | 25.86 | 12 | 0.49 | 24.74 | 2.38 | 1.08 | 1.25 |
| 773 | U1334C | 25.86 | 16 | 0.73 | 21.81 | 2.38 | 1.12 | 1.95 |
| 774 | U1334C | 25.86 | 17 | 0.65 | 26.23 | 2.38 | 1.09 | 1.68 |
| 775 | U1334C | 25.86 | 22 | 0.85 | 25.77 | 2.38 | 1.12 | 2.28 |
| 776 | U1334C | 25.86 | 30 | 1.24 | 24.19 | 2.37 | 1.11 | 3.25 |
| 777 | U1334C | 25.86 | 19 | 0.71 | 26.75 | 2.37 | 1.10 | 1.85 |
| 778 | U1334C | 25.86 | 29 | 1.24 | 23.41 | 2.37 | 1.07 | 3.15 |
| 779 | U1334C | 25.86 | 14 | 0.73 | 19.25 | 2.37 | 1.10 | 1.89 |
| 780 | U1334C | 25.86 | 18 | 0.67 | 27.05 | 2.37 | 1.08 | 1.70 |
| 781 | U1334C | 25.86 | 26 | 1.04 | 25.1  | 2.37 | 1.08 | 2.66 |
| 782 | U1334C | 25.86 | 50 | 2.26 | 22.08 | 2.37 | 1.07 | 5.74 |
| 783 | U1334C | 25.86 | 29 | 1.11 | 26.03 | 2.37 | 1.06 | 2.81 |
| 784 | U1334C | 25.86 | 29 | 1.26 | 23.03 | 2.37 | 1.09 | 3.25 |
| 785 | U1334C | 25.86 | 46 | 1.78 | 25.91 | 2.37 | 1.04 | 4.36 |
| 786 | U1334C | 25.86 | 25 | 1.29 | 19.45 | 2.37 | 1.02 | 3.10 |
| 787 | U1334C | 25.86 | 37 | 1.83 | 20.23 | 2.37 | 1.03 | 4.44 |
| 788 | U1334C | 25.86 | 34 | 1.68 | 20.22 | 2.37 | 1.01 | 4.00 |
| 789 | U1334C | 25.86 | 30 | 1.44 | 20.82 | 2.37 | 1.03 | 3.51 |
| 790 | U1334C | 25.86 | 14 | 0.59 | 23.8  | 2.37 | 1.03 | 1.43 |
| 791 | U1334C | 25.86 | 22 | 0.88 | 24.92 | 2.37 | 1.04 | 2.17 |
| 792 | U1334C | 25.86 | 18 | 0.80 | 22.48 | 2.37 | 1.07 | 2.03 |
| 793 | U1334C | 25.86 | 24 | 1.13 | 21.21 | 2.37 | 1.14 | 3.05 |
| 794 | U1334C | 25.86 | 32 | 1.63 | 19.6  | 2.37 | 1.15 | 4.43 |
| 795 | U1334C | 25.86 | 30 | 1.50 | 20.04 | 2.37 | 1.10 | 3.92 |
| 796 | U1334C | 25.86 | 18 | 1.08 | 16.66 | 2.37 | 1.09 | 2.79 |
| 797 | U1334C | 25.86 | 20 | 0.82 | 24.48 | 2.37 | 1.04 | 2.01 |

|     |        |       |     |      |       |      |      |      |
|-----|--------|-------|-----|------|-------|------|------|------|
| 798 | U1334C | 25.86 | 20  | 0.95 | 21.13 | 2.37 | 1.05 | 2.36 |
| 799 | U1334C | 25.86 | 11  | 0.56 | 19.78 | 2.37 | 1.03 | 1.36 |
| 800 | U1334C | 25.86 | 23  | 1.12 | 20.56 | 2.37 | 1.00 | 2.65 |
| 801 | U1334C | 25.86 | 21  | 0.88 | 23.82 | 2.37 | 1.00 | 2.08 |
| 802 | U1334C | 25.86 | 25  | 0.62 | 40.04 | 2.37 | 0.98 | 1.44 |
| 803 | U1334C | 25.86 | 14  | 0.58 | 24.28 | 2.37 | 0.98 | 1.34 |
| 804 | U1334C | 25.86 | 24  | 1.05 | 22.84 | 2.37 | 0.98 | 2.43 |
| 805 | U1334C | 25.86 | 24  | 1.01 | 23.72 | 2.37 | 1.04 | 2.49 |
| 806 | U1334C | 25.86 | 24  | 1.06 | 22.55 | 2.37 | 1.03 | 2.58 |
| 807 | U1334C | 25.86 | 13  | 0.54 | 24.13 | 2.37 | 1.08 | 1.37 |
| 808 | U1334B | 25.86 | 40  | 1.50 | 26.65 | 2.37 | 1.10 | 3.90 |
| 809 | U1334B | 25.86 | 39  | 1.40 | 27.76 | 2.37 | 1.12 | 3.71 |
| 810 | U1334B | 25.86 | 16  | 0.59 | 26.99 | 2.37 | 1.09 | 1.53 |
| 811 | U1334B | 25.86 | 33  | 1.22 | 26.95 | 2.37 | 1.11 | 3.21 |
| 812 | U1334B | 25.86 | 21  | 0.87 | 24.11 | 2.37 | 1.08 | 2.22 |
| 813 | U1334B | 25.86 | 32  | 1.26 | 25.35 | 2.37 | 1.10 | 3.30 |
| 814 | U1334B | 25.86 | 48  | 1.79 | 26.75 | 2.37 | 1.09 | 4.63 |
| 815 | U1334B | 25.86 | 29  | 0.81 | 36.02 | 2.37 | 1.08 | 2.05 |
| 816 | U1334B | 25.86 | 22  | 0.95 | 23.15 | 2.37 | 1.10 | 2.48 |
| 817 | U1334B | 25.86 | 14  | 0.54 | 26    | 2.37 | 1.11 | 1.41 |
| 818 | U1334B | 25.86 | 24  | 0.94 | 25.54 | 2.37 | 1.12 | 2.50 |
| 819 | U1334B | 25.86 | 39  | 1.26 | 30.85 | 2.37 | 1.12 | 3.36 |
| 820 | U1334B | 25.86 | 41  | 1.53 | 26.72 | 2.37 | 1.08 | 3.92 |
| 821 | U1334B | 25.86 | 22  | 0.87 | 25.25 | 2.37 | 1.09 | 2.24 |
| 822 | U1334B | 25.86 | 23  | 0.79 | 28.94 | 2.37 | 1.08 | 2.02 |
| 823 | U1334B | 25.86 | 22  | 0.68 | 32.51 | 2.37 | 1.07 | 1.71 |
| 824 | U1334B | 25.86 | 13  | 0.51 | 25.52 | 2.37 | 1.07 | 1.29 |
| 825 | U1334B | 25.86 | 115 | 3.38 | 34.02 | 2.37 | 1.10 | 8.80 |
| 826 | U1334B | 25.86 | 36  | 1.18 | 30.59 | 1.85 | 1.10 | 2.40 |
| 827 | U1334B | 25.86 | 14  | 0.42 | 33.03 | 1.64 | 1.07 | 0.74 |
| 828 | U1334B | 25.86 | 15  | 0.48 | 31.56 | 1.64 | 1.05 | 0.82 |
| 829 | U1334B | 25.86 | 48  | 1.73 | 27.75 | 1.64 | 1.08 | 3.07 |
| 830 | U1334B | 25.86 | 22  | 0.77 | 28.49 | 1.64 | 1.01 | 1.29 |
| 831 | U1334B | 25.86 | 40  | 1.26 | 31.85 | 1.64 | 1.05 | 2.17 |
| 832 | U1334B | 25.86 | 48  | 1.80 | 26.67 | 1.64 | 1.04 | 3.06 |
| 833 | U1334B | 25.86 | 52  | 1.93 | 26.98 | 1.64 | 1.03 | 3.27 |
| 834 | U1334B | 25.86 | 39  | 1.52 | 25.67 | 1.64 | 1.05 | 2.62 |
| 835 | U1334B | 25.86 | 63  | 2.11 | 29.86 | 1.64 | 1.05 | 3.65 |
| 836 | U1334B | 25.86 | 48  | 1.55 | 30.95 | 1.64 | 1.06 | 2.70 |
| 837 | U1334B | 25.86 | 47  | 1.48 | 31.83 | 1.64 | 1.09 | 2.64 |
| 838 | U1334B | 25.86 | 61  | 2.04 | 29.87 | 1.64 | 1.02 | 3.43 |
| 839 | U1334B | 25.86 | 32  | 1.06 | 30.27 | 1.64 | 1.02 | 1.77 |
| 840 | U1334B | 25.86 | 36  | 1.31 | 27.42 | 1.64 | 1.03 | 2.23 |
| 841 | U1334B | 25.86 | 29  | 0.99 | 29.27 | 1.64 | 1.03 | 1.68 |
| 842 | U1334B | 25.86 | 32  | 1.16 | 27.5  | 1.64 | 1.08 | 2.06 |
| 843 | U1334B | 25.86 | 39  | 1.31 | 29.72 | 1.64 | 1.07 | 2.32 |
| 844 | U1334B | 25.86 | 36  | 1.30 | 27.78 | 1.64 | 1.10 | 2.34 |

|     |        |       |    |      |       |      |      |      |
|-----|--------|-------|----|------|-------|------|------|------|
| 845 | U1334B | 25.86 | 22 | 0.77 | 28.62 | 1.64 | 1.06 | 1.33 |
| 846 | U1334B | 25.86 | 45 | 1.65 | 27.22 | 1.64 | 1.09 | 2.97 |
| 847 | U1334B | 25.86 | 20 | 0.70 | 28.75 | 1.64 | 1.09 | 1.25 |
| 848 | U1334B | 25.86 | 33 | 1.08 | 30.43 | 1.64 | 1.08 | 1.92 |
| 849 | U1334B | 25.86 | 27 | 0.87 | 31.06 | 1.64 | 1.06 | 1.52 |
| 850 | U1334B | 25.86 | 62 | 2.20 | 28.22 | 1.64 | 1.08 | 3.91 |
| 851 | U1334B | 25.86 | 17 | 0.60 | 28.48 | 1.64 | 1.07 | 1.05 |
| 852 | U1334B | 25.86 | 44 | 1.59 | 27.66 | 1.64 | 1.08 | 2.83 |
| 853 | U1334B | 25.86 | 29 | 0.96 | 30.11 | 1.64 | 1.07 | 1.70 |
| 854 | U1334B | 25.86 | 40 | 1.52 | 26.33 | 1.64 | 1.11 | 2.76 |
| 855 | U1334B | 25.86 | 24 | 0.91 | 26.48 | 1.64 | 1.07 | 1.59 |
| 856 | U1334B | 25.86 | 43 | 1.53 | 28.11 | 1.64 | 1.07 | 2.70 |
| 857 | U1334B | 25.86 | 18 | 0.63 | 28.54 | 1.64 | 1.07 | 1.11 |
| 858 | U1334B | 25.86 | 31 | 1.20 | 25.9  | 2.51 | 1.09 | 3.29 |
| 859 | U1334B | 25.86 | 16 | 0.69 | 23.29 | 2.51 | 1.08 | 1.86 |
| 860 | U1334B | 25.86 | 27 | 1.12 | 24.02 | 2.51 | 1.04 | 2.95 |
| 861 | U1334B | 25.86 | 38 | 1.42 | 26.69 | 2.51 | 1.04 | 3.73 |
| 862 | U1334B | 25.86 | 20 | 0.73 | 27.27 | 2.51 | 1.06 | 1.95 |
| 863 | U1334B | 25.86 | 32 | 1.17 | 27.28 | 2.51 | 1.06 | 3.12 |
| 864 | U1334B | 25.86 | 33 | 1.29 | 25.62 | 2.51 | 1.07 | 3.47 |
| 865 | U1334B | 25.86 | 32 | 1.24 | 25.77 | 2.51 | 1.08 | 3.38 |
| 866 | U1334B | 25.86 | 40 | 1.73 | 23.14 | 2.51 | 1.06 | 4.62 |
| 867 | U1334B | 25.86 | 23 | 1.00 | 23.07 | 2.51 | 1.07 | 2.67 |
| 868 | U1334B | 25.86 | 22 | 0.91 | 24.17 | 2.51 | 1.08 | 2.48 |
| 869 | U1334B | 25.86 | 13 | 0.61 | 21.33 | 2.51 | 1.03 | 1.58 |
| 870 | U1334B | 25.86 | 23 | 0.86 | 26.81 | 2.51 | 1.04 | 2.25 |
| 871 | U1334B | 25.86 | 14 | 0.47 | 30.02 | 2.51 | 1.07 | 1.26 |
| 872 | U1334B | 25.86 | 25 | 0.85 | 29.33 | 2.51 | 1.07 | 2.29 |
| 873 | U1334B | 25.86 | 30 | 1.21 | 24.75 | 2.51 | 1.04 | 3.17 |
| 874 | U1334B | 25.86 | 24 | 0.93 | 25.82 | 2.51 | 1.07 | 2.51 |
| 875 | U1334B | 25.86 | 19 | 0.69 | 27.41 | 2.51 | 1.05 | 1.83 |
| 876 | U1334B | 25.86 | 36 | 1.23 | 29.19 | 2.51 | 1.04 | 3.23 |
| 877 | U1334B | 25.86 | 26 | 0.85 | 30.5  | 2.51 | 1.08 | 2.31 |
| 878 | U1334B | 25.86 | 30 | 0.99 | 30.34 | 2.51 | 1.08 | 2.69 |
| 879 | U1334B | 25.86 | 28 | 0.91 | 30.89 | 2.51 | 1.10 | 2.50 |
| 880 | U1334B | 25.86 | 30 | 1.04 | 28.76 | 2.51 | 1.11 | 2.90 |
| 881 | U1334B | 25.86 | 23 | 0.94 | 24.58 | 2.51 | 1.12 | 2.63 |
| 882 | U1334B | 25.86 | 29 | 1.09 | 26.5  | 2.51 | 1.12 | 3.09 |
| 883 | U1334B | 25.86 | 25 | 0.92 | 27.25 | 2.51 | 1.12 | 2.58 |
| 884 | U1334B | 25.86 | 29 | 1.05 | 27.68 | 2.51 | 1.08 | 2.86 |
| 885 | U1334B | 25.86 | 21 | 0.79 | 26.75 | 2.51 | 1.10 | 2.17 |
| 886 | U1334B | 25.86 | 21 | 0.87 | 24.02 | 2.51 | 1.09 | 2.40 |
| 887 | U1334B | 25.86 | 22 | 0.90 | 24.56 | 2.51 | 1.11 | 2.51 |
| 888 | U1334B | 25.86 | 12 | 0.55 | 21.73 | 2.51 | 1.07 | 1.48 |
| 889 | U1334B | 25.86 | 19 | 0.85 | 22.25 | 2.51 | 1.09 | 2.34 |
| 890 | U1334B | 25.86 | 20 | 0.79 | 25.33 | 2.51 | 1.08 | 2.14 |
| 891 | U1334B | 25.86 | 33 | 1.21 | 27.21 | 2.51 | 1.07 | 3.28 |

|     |        |       |    |      |       |      |      |      |
|-----|--------|-------|----|------|-------|------|------|------|
| 892 | U1334B | 25.86 | 32 | 1.28 | 25.03 | 2.51 | 1.09 | 3.50 |
| 893 | U1334B | 25.86 | 28 | 1.11 | 25.31 | 2.51 | 1.11 | 3.09 |
| 894 | U1334B | 25.86 | 53 | 1.87 | 28.4  | 2.51 | 1.12 | 5.23 |
| 895 | U1334B | 25.86 | 37 | 1.58 | 23.43 | 2.51 | 1.09 | 4.34 |
| 896 | U1334B | 25.86 | 18 | 0.72 | 25.04 | 2.51 | 1.07 | 1.94 |
| 897 | U1334B | 25.86 | 23 | 1.00 | 23.1  | 1.53 | 1.03 | 1.56 |
| 898 | U1334B | 25.86 | 18 | 0.77 | 23.44 | 1.53 | 1.07 | 1.26 |
| 899 | U1334B | 25.86 | 19 | 0.75 | 25.4  | 1.53 | 1.06 | 1.21 |
| 900 | U1334B | 25.86 | 22 | 0.89 | 24.7  | 1.53 | 1.06 | 1.44 |
| 901 | U1334C | 25.86 | 17 | 0.90 | 18.88 | 1.53 | 1.05 | 1.44 |
| 902 | U1334C | 25.86 | 20 | 1.05 | 19.11 | 1.53 | 1.03 | 1.64 |
| 903 | U1334C | 25.86 | 10 | 0.53 | 18.79 | 1.53 | 1.04 | 0.84 |
| 904 | U1334C | 25.86 | 15 | 0.68 | 22.18 | 1.53 | 1.03 | 1.06 |
| 905 | U1334C | 25.86 | 17 | 0.68 | 24.97 | 1.53 | 1.05 | 1.09 |
| 906 | U1334C | 25.86 | 13 | 0.63 | 20.54 | 1.53 | 1.06 | 1.02 |
| 907 | U1334C | 25.86 | 11 | 0.50 | 22.06 | 1.53 | 1.04 | 0.79 |
| 908 | U1334C | 25.86 | 13 | 0.69 | 18.9  | 1.53 | 1.02 | 1.07 |
| 909 | U1334C | 25.86 | 6  | 0.33 | 18.07 | 1.53 | 1.01 | 0.51 |
| 910 | U1334C | 25.86 | 19 | 0.99 | 19.28 | 1.53 | 1.02 | 1.54 |
| 911 | U1334C | 25.86 | 19 | 0.95 | 20.02 | 1.53 | 1.06 | 1.54 |
| 912 | U1334C | 25.86 | 14 | 0.71 | 19.84 | 1.53 | 1.06 | 1.14 |
| 913 | U1334C | 25.86 | 32 | 1.03 | 31.03 | 1.53 | 1.09 | 1.72 |
| 914 | U1334C | 25.86 | 14 | 0.53 | 26.18 | 1.53 | 0.99 | 0.81 |
| 915 | U1334C | 25.86 | 11 | 0.35 | 31.36 | 1.53 | 1.02 | 0.55 |
| 916 | U1334C | 25.86 | 11 | 0.46 | 24.1  | 1.53 | 0.99 | 0.69 |
| 917 | U1334C | 25.86 | 30 | 1.33 | 22.54 | 1.53 | 0.95 | 1.94 |
| 918 | U1334C | 25.86 | 27 | 1.17 | 23.15 | 1.53 | 0.98 | 1.75 |
| 919 | U1334C | 25.86 | 14 | 0.56 | 25.18 | 1.53 | 0.99 | 0.84 |
| 920 | U1334C | 25.86 | 32 | 1.23 | 25.97 | 1.53 | 1.04 | 1.95 |
| 921 | U1334C | 25.86 | 30 | 1.13 | 26.44 | 1.53 | 1.04 | 1.81 |
| 922 | U1334C | 25.86 | 21 | 0.86 | 24.37 | 1.53 | 1.01 | 1.34 |
| 923 | U1334C | 25.86 | 46 | 1.96 | 23.44 | 1.53 | 1.03 | 3.09 |
| 924 | U1334C | 25.86 | 30 | 1.24 | 24.23 | 1.53 | 1.06 | 2.00 |
| 925 | U1334C | 25.86 | 35 | 1.60 | 21.88 | 1.53 | 1.02 | 2.50 |
| 926 | U1334C | 25.86 | 69 | 2.50 | 27.62 | 1.53 | 1.03 | 3.94 |
| 927 | U1334C | 25.86 | 24 | 1.11 | 21.56 | 1.53 | 1.05 | 1.78 |
| 928 | U1334C | 25.86 | 27 | 1.09 | 24.72 | 1.53 | 1.06 | 1.77 |
| 929 | U1334C | 25.86 | 36 | 1.51 | 23.85 | 1.53 | 1.07 | 2.48 |
| 930 | U1334C | 25.86 | 45 | 1.72 | 26.12 | 1.79 | 1.04 | 3.20 |
| 931 | U1334C | 25.86 | 46 | 2.08 | 22.15 | 1.79 | 1.06 | 3.91 |
| 932 | U1334C | 25.86 | 29 | 1.16 | 24.96 | 1.79 | 1.06 | 2.21 |
| 933 | U1334C | 25.86 | 34 | 1.29 | 26.44 | 1.79 | 1.04 | 2.39 |
| 934 | U1334C | 25.86 | 29 | 1.20 | 24.09 | 1.79 | 1.04 | 2.23 |
| 935 | U1334C | 25.86 | 25 | 1.09 | 22.92 | 1.79 | 1.05 | 2.03 |
| 936 | U1334C | 25.86 | 48 | 1.76 | 27.23 | 1.79 | 1.02 | 3.22 |
| 937 | U1334C | 25.86 | 18 | 0.64 | 28.27 | 1.79 | 0.96 | 1.10 |
| 938 | U1334C | 25.86 | 29 | 0.93 | 31.12 | 1.79 | 1.06 | 1.76 |

|     |        |       |     |      |       |      |      |      |
|-----|--------|-------|-----|------|-------|------|------|------|
| 939 | U1334C | 25.86 | 25  | 1.32 | 18.93 | 1.79 | 1.04 | 2.44 |
| 940 | U1334C | 25.86 | 51  | 2.88 | 17.68 | 1.79 | 0.99 | 5.12 |
| 941 | U1334C | 25.86 | 21  | 1.04 | 20.19 | 1.79 | 1.05 | 1.95 |
| 942 | U1334C | 25.86 | 27  | 1.32 | 20.38 | 1.79 | 1.01 | 2.38 |
| 943 | U1334C | 25.86 | 23  | 0.94 | 24.55 | 1.79 | 1.00 | 1.68 |
| 944 | U1334C | 25.86 | 27  | 1.05 | 25.62 | 1.79 | 1.01 | 1.90 |
| 945 | U1334C | 25.86 | 25  | 0.91 | 27.48 | 1.79 | 0.99 | 1.62 |
| 946 | U1334C | 25.86 | 26  | 1.11 | 23.38 | 1.79 | 1.02 | 2.03 |
| 947 | U1334C | 25.86 | 26  | 1.13 | 22.93 | 1.79 | 0.99 | 2.01 |
| 948 | U1334C | 25.86 | 31  | 1.24 | 24.92 | 1.79 | 1.00 | 2.22 |
| 949 | U1334C | 25.86 | 33  | 1.24 | 26.61 | 1.79 | 1.01 | 2.23 |
| 950 | U1334C | 25.86 | 36  | 1.25 | 28.79 | 1.79 | 0.98 | 2.19 |
| 951 | U1334C | 25.86 | 19  | 0.90 | 21.2  | 1.79 | 0.90 | 1.44 |
| 952 | U1334C | 25.86 | 64  | 2.33 | 27.44 | 1.79 | 0.90 | 3.74 |
| 953 | U1334C | 25.86 | 19  | 0.88 | 21.57 | 1.79 | 0.96 | 1.51 |
| 954 | U1334C | 25.86 | 25  | 0.93 | 26.76 | 1.79 | 0.99 | 1.65 |
| 955 | U1334C | 25.86 | 29  | 0.90 | 32.3  | 1.79 | 0.99 | 1.59 |
| 956 | U1334C | 25.86 | 30  | 1.10 | 27.25 | 1.79 | 1.01 | 1.99 |
| 957 | U1334C | 25.86 | 42  | 1.41 | 29.85 | 1.79 | 0.97 | 2.44 |
| 958 | U1334C | 25.86 | 37  | 1.31 | 28.28 | 1.79 | 0.94 | 2.20 |
| 959 | U1334C | 25.86 | 42  | 1.53 | 27.5  | 1.79 | 0.97 | 2.65 |
| 960 | U1334C | 25.86 | 39  | 1.71 | 22.83 | 1.79 | 1.01 | 3.07 |
| 961 | U1334C | 25.86 | 40  | 1.77 | 22.66 | 1.79 | 1.05 | 3.29 |
| 962 | U1334C | 25.86 | 42  | 1.49 | 28.23 | 1.79 | 1.09 | 2.90 |
| 963 | U1334C | 25.86 | 33  | 1.10 | 30.06 | 1.79 | 1.08 | 2.11 |
| 964 | U1334C | 25.86 | 121 | 4.13 | 29.32 | 1.79 | 1.06 | 7.84 |
| 965 | U1334C | 25.86 | 40  | 1.64 | 24.46 | 1.79 | 1.09 | 3.19 |
| 966 | U1334C | 25.86 | 18  | 0.72 | 25.11 | 1.79 | 1.08 | 1.39 |
| 967 | U1334C | 25.86 | 35  | 1.43 | 24.42 | 1.79 | 1.12 | 2.87 |
| 968 | U1334C | 25.86 | 57  | 1.92 | 29.7  | 1.79 | 1.13 | 3.88 |
| 969 | U1334C | 25.86 | 68  | 2.54 | 26.82 | 1.75 | 1.15 | 5.08 |
| 970 | U1334C | 25.86 | 62  | 2.23 | 27.86 | 1.75 | 1.12 | 4.36 |
| 971 | U1334C | 25.86 | 50  | 2.23 | 22.45 | 1.75 | 1.08 | 4.19 |
| 972 | U1334C | 25.86 | 27  | 1.02 | 26.58 | 1.75 | 1.09 | 1.93 |
| 973 | U1334C | 25.86 | 41  | 1.25 | 32.73 | 1.75 | 1.12 | 2.44 |
| 974 | U1334C | 25.86 | 48  | 1.55 | 30.9  | 1.75 | 1.06 | 2.88 |
| 975 | U1334C | 25.86 | 47  | 1.71 | 27.49 | 1.75 | 1.03 | 3.08 |
| 976 | U1334C | 25.86 | 49  | 1.67 | 29.28 | 1.75 | 1.05 | 3.08 |
| 977 | U1334C | 25.86 | 56  | 2.22 | 25.19 | 1.75 | 1.04 | 4.03 |
| 978 | U1334C | 25.86 | 31  | 1.42 | 21.88 | 1.75 | 1.04 | 2.58 |
| 979 | U1334C | 25.86 | 11  | 0.50 | 21.92 | 1.75 | 1.02 | 0.89 |
| 980 | U1334C | 25.86 | 21  | 0.69 | 30.46 | 1.75 | 1.04 | 1.25 |
| 981 | U1334C | 25.86 | 21  | 0.68 | 30.71 | 1.75 | 1.01 | 1.20 |

LSR: linear sedimentation rate

DBD: dry bulk density

ASAR: atelostomate spine accumulation rate
