# Supplementary material for: A 104-Ma record of deep-sea Atelostomata (Holasterioda, Spatangoida, irregular echinoids) – a story of persistence, food availability and a big bang
Source: PubMed Central journal article supplement (PMC10411753; doi:10.1371/journal.pone.0288046), 2023-08-09
Supplement: pone.0288046.s006.pdf [file pone.0288046.s006.pdf]

**data set Holes U1406A, B**

| <b>sample id</b> | <b>hole</b> | <b>core</b> | <b>interval</b> | <b>age in Fig. 7</b> | <b>spines</b> | <b>spines/g</b> | <b>dry weight (g)</b> | <b>LSR</b> | <b>DBD</b> |
|------------------|-------------|-------------|-----------------|----------------------|---------------|-----------------|-----------------------|------------|------------|
| 1                | U1406B      | 12H-5W      | 82-84           | 25.10                | 34            | 1.61            | 21.07                 | 1.37       | 0.73       |
| 2                | U1406A      | 12H-3W      | 118-120         | 25.10                | 18            | 0.88            | 20.47                 | 1.37       | 0.80       |
| 3                | U1406B      | 13H-2W      | 130-132         | 25.10                | 5             | 0.25            | 20.34                 | 2.22       | 0.82       |
| 4                | U1406B      | 13H-3W      | 118-120         | 25.10                | 7             | 0.35            | 20.22                 | 2.22       | 0.82       |
| 5                | U1406B      | 13H-4W      | 22-24           | 25.10                | 9             | 0.45            | 20.08                 | 2.22       | 0.82       |
| 6                | U1406B      | 13H-6W      | 22-24           | 25.10                | 3             | 0.19            | 15.46                 | 2.22       | 0.82       |
| 7                | U1406A      | 13H-3W      | 36-38           | 25.10                | 6             | 0.34            | 17.48                 | 2.22       | 0.82       |
| 8                | U1406A      | 13H-3W      | 4-6             | 25.10                | 5             | 0.47            | 10.58                 | 2.22       | 0.74       |
| 9                | U1406A      | 13H-3W      | 26-28           | 25.10                | 9             | 0.55            | 16.41                 | 2.22       | 0.74       |

LSR: linear sedimentation rate

DBD: dry bulk density

ASAR: atelostomate spine accumulator

**ASAR**

---

1.61  
0.96  
0.45  
0.63  
0.82  
0.35  
0.62  
0.78  
0.90

rate
