# Supplementary material for: A 104-Ma record of deep-sea Atelostomata (Holasterioda, Spatangoida, irregular echinoids) – a story of persistence, food availability and a big bang
Source: PubMed Central journal article supplement (PMC10411753; doi:10.1371/journal.pone.0288046), 2023-08-09
Supplement: pone.0288046.s007.pdf [file pone.0288046.s007.pdf]

data set Holes U1407A, C

| sample id        | hole   | core   | age in Fig. 7 | spines | spines/g | dry weight (g) | LSR  | DBD  | ASAR |
|------------------|--------|--------|---------------|--------|----------|----------------|------|------|------|
| <b>post-OAE2</b> |        |        |               |        |          |                |      |      |      |
| 1                | U1407A | 27H-1X | 93.00         | 15     | 1.00     | 15.00          | 0.05 | 1.21 | 0.06 |
| 2                | U1407A | 27H-1X | 93.00         | 14     | 1.39     | 10.10          | 0.05 | 1.21 | 0.08 |
| 3                | U1407A | 27H-1X | 93.00         | 10     | 0.93     | 10.80          | 0.05 | 1.21 | 0.06 |
| 4                | U1407A | 27H-3X | 93.00         | 52     | 3.56     | 14.60          | 0.86 | 1.15 | 3.52 |
| 5                | U1407A | 27H-3X | 93.00         | 8      | 0.68     | 11.80          | 0.86 | 1.15 | 0.67 |
| 6                | U1407A | 27H-3X | 93.00         | 17     | 1.24     | 13.70          | 0.86 | 1.15 | 1.23 |
| 7                | U1407A | 27H-3X | 93.00         | 6      | 0.47     | 12.70          | 0.86 | 1.15 | 0.47 |
| 8                | U1407A | 27H-4X | 93.00         | 2      | 0.13     | 15.30          | 0.86 | 1.15 | 0.13 |
| 9                | U1407A | 27H-4X | 93.00         | 13     | 0.54     | 24.10          | 0.86 | 1.15 | 0.53 |
| 10               | U1407A | 27H-4X | 93.00         | 30     | 2.29     | 13.10          | 0.86 | 1.15 | 2.26 |
| 11               | U1407A | 27H-4X | 93.00         | 15     | 0.90     | 16.60          | 0.86 | 1.15 | 0.89 |
| 12               | U1407A | 27H-4X | 93.00         | 13     | 0.76     | 17.10          | 0.86 | 1.15 | 0.75 |
| 13               | U1407A | 27H-4X | 93.00         | 1      | 0.06     | 16.50          | 0.86 | 1.15 | 0.06 |
| 14               | U1407A | 27H-4X | 93.00         | 11     | 0.52     | 21.00          | 0.86 | 1.15 | 0.52 |
| 15               | U1407A | 27H-5X | 93.00         | 3      | 0.17     | 17.50          | 0.86 | 1.15 | 0.17 |
| 16               | U1407A | 27H-5X | 93.00         | 10     | 0.48     | 20.80          | 0.86 | 1.15 | 0.48 |
| 17               | U1407A | 27H-5X | 93.00         | 3      | 0.12     | 24.30          | 0.86 | 1.15 | 0.12 |
| 18               | U1407A | 27H-5X | 93.00         | 12     | 0.71     | 16.80          | 0.86 | 1.15 | 0.71 |
| 19               | U1407A | 27H-5X | 93.00         | 37     | 1.91     | 19.40          | 0.86 | 1.15 | 1.89 |
| 20               | U1407A | 27H-5X | 93.00         | 10     | 0.69     | 14.40          | 0.86 | 1.15 | 0.69 |
| 21               | U1407A | 27H-6X | 93.00         | 13     | 0.62     | 21.00          | 0.86 | 1.15 | 0.61 |
| 22               | U1407A | 27H-6X | 93.00         | 10     | 0.39     | 25.70          | 0.86 | 1.15 | 0.38 |
| 23               | U1407A | 27H-6X | 93.00         | 3      | 0.15     | 20.00          | 0.86 | 1.15 | 0.15 |
| <b>pre-OAE2</b>  |        |        |               |        |          |                |      |      |      |
| 24               | U1407C | 26H-5X | 94.00         | 73     | 4.80     | 15.20          | 0.39 | 1.47 | 2.78 |
| 25               | U1407C | 26H-5X | 94.00         | 29     | 2.50     | 11.60          | 0.39 | 1.47 | 1.45 |
| 26               | U1407C | 26H-6X | 94.00         | 25     | 2.34     | 10.70          | 0.39 | 1.47 | 1.35 |
| 27               | U1407C | 26H-6X | 94.00         | 40     | 3.45     | 11.60          | 0.39 | 1.47 | 2.00 |
| 28               | U1407C | 26H-6X | 94.00         | 3      | 0.29     | 10.20          | 0.39 | 1.47 | 0.17 |
| 29               | U1407C | 26H-6X | 94.00         | 30     | 2.31     | 13.00          | 0.39 | 1.47 | 1.34 |
| 30               | U1407C | 26H-6X | 94.00         | 19     | 1.78     | 10.70          | 0.39 | 1.47 | 1.03 |
| 31               | U1407C | 26H-6X | 94.00         | 9      | 0.55     | 16.30          | 0.39 | 1.47 | 0.32 |
| 32               | U1407C | 26H-6X | 94.00         | 9      | 0.74     | 12.20          | 0.39 | 1.47 | 0.43 |
| 33               | U1407C | 26H-6X | 94.00         | 5      | 0.33     | 15.00          | 0.39 | 1.47 | 0.19 |
| 34               | U1407C | 27H-1X | 94.00         | 30     | 2.36     | 12.70          | 0.39 | 1.47 | 1.37 |
| 35               | U1407C | 27H-1X | 94.00         | 14     | 0.79     | 17.80          | 0.39 | 1.47 | 0.46 |
| 36               | U1407C | 27H-1X | 94.00         | 123    | 5.17     | 23.80          | 0.39 | 1.47 | 2.99 |
| 37               | U1407C | 27H-2X | 94.00         | 41     | 1.88     | 21.80          | 0.39 | 1.47 | 1.09 |
| 38               | U1407C | 27H-3X | 94.00         | 63     | 2.94     | 21.40          | 0.39 | 1.47 | 1.71 |
| 39               | U1407C | 27H-3X | 94.00         | 53     | 2.79     | 19.00          | 0.39 | 1.47 | 1.62 |
| 40               | U1407C | 27H-4X | 94.00         | 76     | 3.60     | 21.10          | 0.39 | 1.47 | 2.09 |
| 41               | U1407C | 27H-5X | 94.00         | 10     | 0.48     | 21.00          | 0.39 | 1.47 | 0.28 |
| 42               | U1407C | 27H-6X | 94.00         | 4      | 0.19     | 21.10          | 0.39 | 1.47 | 0.11 |

LSR: linear sedimentation rate

DBD: dry bulk density

ASAR: atelostomate spine accumulation rate
